# 1 Principles of Meiotic Chromosome Assembly

2  
3 \*Stephanie A. Schalbetter<sup>1</sup>, \*Geoffrey Fudenberg<sup>2</sup>, Jonathan Baxter<sup>1</sup>, Katherine S. Pollard<sup>2,3,4</sup>,  
4 and Matthew J. Neale<sup>1</sup>

5  
6 \* SAS & GF contributed equally to this work

- 7  
8 1. Genome Damage and Stability Centre, School of Life Sciences, University of Sussex, UK  
9 2. Gladstone Institutes for Data Science and Biotechnology, San Francisco, USA  
10 3. Department of Epidemiology & Biostatistics, Institute for Human Genetics, Quantitative Biology  
11 Institute, and Institute for Computational Health Sciences, University of California, San Francisco,  
12 California, USA.  
13 4. Chan-Zuckerberg Biohub, San Francisco, California, USA.  
14  
15

## 16 Abstract

17 During meiotic prophase, chromosomes organise into a series of chromatin loops emanating from  
18 a proteinaceous axis, but the mechanisms of assembly remain unclear. Here we elucidate how  
19 this elaborate three-dimensional chromosome organisation is underpinned by genomic sequence  
20 in *Saccharomyces cerevisiae*. Entering meiosis, strong cohesin-dependent grid-like Hi-C  
21 interaction patterns emerge, reminiscent of mammalian interphase organisation, but with distinct  
22 regulation. Meiotic patterns agree with simulations of loop extrusion limited by barriers, yet are  
23 patterned by convergent transcription rather than binding of the mammalian interphase factor,  
24 CTCF, which is absent in *S. cerevisiae*—thereby both challenging and extending current  
25 paradigms of local chromosome organisation. While grid-like interactions emerge independently  
26 of meiotic chromosome synapsis, synapsis itself generates additional compaction that matures  
27 differentially according to telomere proximity and chromosome size. Collectively, our results  
28 elucidate fundamental principles of chromosome assembly and demonstrate the essential role of  
29 cohesin within this evolutionarily conserved process.

## 30 Introduction and Results

31 During meiosis, eukaryotic chromosomes are broken, repaired and paired with their homologs  
32 followed by two rounds of segregation—a series of events accompanied by dynamic structural  
33 changes of the chromosomes. Most prominent is the paired arrangement of pachytene  
34 chromosomes into a dense array of chromatin loops emanating from proteinaceous axes linked  
35 by a central core, the synaptonemal complex (SC), which is highly conserved across  
36 eukaryotes<sup>1,2</sup>. In *S. cerevisiae*, structural components include the meiotic cohesin kleisin subunit,  
37 Rec8<sup>3</sup>, the transverse filament, Zip1<sup>4</sup>, the axial/lateral elements, Hop1 and Red1<sup>5,6</sup>, and the pro-  
38 DSB factors Rec114-Mei4-Mer2 (RMM)<sup>7,8</sup>. Much of our understanding of meiotic chromosome  
39 structure has been deduced from a combination of electron microscopy, immunofluorescence  
40 microscopy, and the genome-wide patterns of protein localisation determined by ChIP. However,  
41 the link between key meiotic protein complexes, chromosome conformation, and genomic  
42 sequence remains uncharacterized.

43

44 Chromosome conformation capture (3C) techniques generate maps of pairwise contact  
45 frequencies that are snapshots of chromosome organisation. 3C methods were originally applied  
46 to assay chromosome conformation in *S. cerevisiae*, including during meiosis<sup>9</sup>. Now they are  
47 widely used across a range of organisms and cellular contexts to link 3D organisation directly with  
48 genomic sequence<sup>10</sup>, revealing important roles of the Structural Maintenance of Chromosomes  
49 (SMCs) cohesin and condensin in genomic organization<sup>11,12</sup>, where they likely mediate  
50 chromosome compaction via the process of loop extrusion<sup>13</sup>. Here we return to yeast meiosis to  
51 interrogate genome-wide chromosome organisation by Hi-C, elucidate mechanisms of  
52 chromosome assembly, and define the role of key meiotic chromosome components, including  
53 cohesin and the SC.

54

55 Starting with a synchronized G1 population we analysed timepoints encompassing DNA  
56 replication, meiotic prophase and both meiotic divisions (**Fig. 1a,b,c, Extended Data Fig. 1a,b,c**).  
57 In G1, we detect strong centromere clustering (**Fig. 1a,d**) and folding back of the arms at the  
58 centromeres (**Fig. 1a, Supplementary Fig. 2**), characteristic of a Rab1 conformation<sup>9,14</sup>. During  
59 meiosis, centromere clustering is transiently dissolved (3-5h, **Fig. 1a,d, Extended Data Fig. 1a**);  
60 this coincides with a global decrease in inter-chromosomal contact frequency at mid-prophase,  
61 reflecting chromosome individualisation. Subtelomeric clustering also decreases during meiotic

62 prophase (**Fig. 1a,d, Extended Data Fig. 1a**), with no evidence for the transient telomeric  
63 bouquet conformation, consistent with prior microscopic analyses<sup>15</sup>.

64

65 Entering meiosis, contact frequency versus distance,  $P(s)$ , curves display a shoulder, consistent  
66 with the linear compaction of chromosome arms increasing due to *cis*-loop formation (2-4h, **Fig.**  
67 **1e, Extended Data Fig. 1d**, e.g. as defined<sup>16</sup>; for review<sup>13</sup>). This change in  $P(s)$  is reminiscent of  
68 the SMC-dependent changes observed via Hi-C during mitosis across species<sup>17-21</sup>. Compaction  
69 coincides with meiotic prophase I and the formation of the SC at pachytene, and is lost at later  
70 stages (**Fig. 1e, Extended Data Fig. 1d**).

71

72 To study meiotic chromosome conformation in more detail, and to eliminate cell-to-cell  
73 heterogeneity (**Fig. 1b,c**), we enriched for pachytene cells in subsequent experiments by  
74 inactivating Ndt80, a transcription factor required for exit from meiotic prophase<sup>22</sup>. *ndt80*Δ cells  
75 entered meiosis synchronously, assessed by bulk DNA replication (**Fig. 1f**), but do not initiate  
76 the first nuclear division<sup>22</sup>. Similar to the wild type prophase population (3-5h), but likely  
77 accentuated by the increased homogeneity, Hi-C maps of pachytene-enriched cells displayed  
78 total loss of centromere clustering (**Extended Data Fig. 2**) and dramatic chromosome arm  
79 compaction (**Fig. 1e**). Analysing compaction in more detail, shorter chromosomes (**Extended**  
80 **Data Fig. 1e**) and, in particular, shorter chromosome arms (**Fig. 1h, Extended Data Fig. 1f**),  
81 displayed elevated contact frequency at short genomic separations, and an earlier shoulder,  
82 apparently arising from distinct behavior of subtelomeric and subcentromeric regions (**Fig. 1h,**  
83 **Extended Data Fig. 1g**). Moreover, distinct  $P(s)$  for chromosomes with different length arms  
84 (**Extended Data Fig. 1h**) suggests that the centromere can insulate the process that leads to  
85 differences between arms. In agreement with this, compaction is interrupted at centromeres in Hi-  
86 C maps (**Fig. 1a, Extended Data Fig. 2b**).

87

88 Zooming in to consider within-arm organization revealed punctate grid-like Hi-C interactions  
89 between pairs of loci during prophase (**Fig. 2a**), particularly prominent in *ndt80*Δ (**Fig. 2a,b**). Such  
90 focal meiotic patterns are more prominent than reported previously<sup>23</sup>—resembling peaks between  
91 CTCF sites<sup>24</sup> rather than topological domains<sup>25,26</sup> detected in mammalian interphase Hi-C maps—  
92 and likely arise from a heterogeneous mixture of ‘transitive’ interactions and ‘skipping’ of peak  
93 bases (**Fig. 2c**).

94

95 Genomic regions underlying the punctate Hi-C interactions display a remarkable visual (Fig.  
96 2a,b), and quantitative (Fig. 2d-g), correspondence with previously characterized sites of high  
97 Rec8 occupancy<sup>27</sup>. At pachytene, Rec8 sites display elevated cis/total contact frequencies (Fig.  
98 2c), enriched contact frequency (Fig. 2e,f), and evidence of insulation (Fig. 2g)—features that  
99 correlate with Rec8 occupancy measured by ChIP (Fig. 2a, lower). In wild type cells, Rec8-Rec8  
100 interactions became visible in early prophase (2h), peaked at mid prophase (4h), and were  
101 especially prominent in the homogenous *ndt80*Δ cell population (Fig. 2a-g, Extended Data Fig.  
102 4b,c). Importantly, Rec8-Rec8 enrichments are strongest between adjacent sites, decrease  
103 between non-adjacent sites with increasing genomic separation, and are absent in *trans*  
104 (Extended Data Fig. 4b,c). As for enrichments between CTCF sites in mammalian interphase<sup>28</sup>,  
105 these observations argue that a cis-acting process generates such focal interactions in meiosis.

106  
107 Rec8 is a central component of the meiotic chromosome axis<sup>3</sup>. Assaying a *rec8*Δ mutant enabled  
108 us to determine that Rec8 is absolutely required for the emergence of the grid-like Hi-C patterns  
109 present in meiosis (Fig. 2a,b). Moreover, *rec8*Δ cells completely lose the shoulder in *P*(s),  
110 indicative of a dramatic loss of arm compaction (Fig. 2b, Extended Data Fig. 4a), similar to that  
111 caused by depletion of SMCs in diverse contexts<sup>17,19,21,29–32</sup>. Instead of assembling an axis of  
112 loops, *rec8*Δ cells appear to be caught in a state with highly clustered telomeres (Extended Data  
113 Fig. 4d, Extended Data Fig. 3), consistent with previous observations by microscopy<sup>33,34</sup>.  
114 Moreover, in *rec8*Δ cells *cis* contact frequency is reduced (Fig. 2d), similar to G1 cells, and  
115 *cis*/total no longer correlates with Rec8 occupancy. Instead, *rec8*Δ *cis*/total displays a decreasing  
116 trend along chromosome arms, likely due to persistent telomere clustering (Extended Data Fig.  
117 4d).

118  
119 To test how compaction and grid-like interaction patterns could jointly emerge in meiosis, we  
120 developed polymer simulations (Fig. 3a, Methods) similar to those used to successfully describe  
121 the assembly of TADs in mammalian interphase chromosomes<sup>13</sup>. Importantly, these simulations  
122 employ the *cis*-acting process of loop extrusion, where extruders form progressively larger  
123 chromatin loops, unless impeded by adjacent extruders or barrier elements (Fig. 3a). Extrusion  
124 dynamics are controlled by parameters dictating the *processivity* (average loop size) and  
125 *separation* (number of active extruders), as well as the *strength* of barriers (Methods). Because  
126 the accumulation of Rec8 at ChIP-seq sites<sup>27</sup> concomitant with convergent transcription<sup>35</sup> is  
127 indicative of barriers to extrusion<sup>28</sup>, we positioned bi-directional barriers at Rec8 sites.

128

129 Simulations were used to explore variations in loop extrusion dynamics to determine whether  
130 specific parameter combinations are able to generate Hi-C maps that agree with experimental  
131 observation (**Fig. 3, Methods**). Models with excellent fits were identified in which ~65% of the  
132 genome is covered by extruded loops (**Fig. 3b,c, Extended Data Fig. 5**)—a far denser array than  
133 present in *S. cerevisiae* mitosis<sup>21</sup>, but still less compact than human mitotic cells<sup>20</sup>. Even though  
134 extrusion can generate compaction independently of barriers (**Fig. 3d**), an intermediate barrier  
135 strength is essential to match the grid-like patterns observed experimentally (**Fig. 3b**). Despite  
136 the simplifying assumptions, simulated chromosomes displayed many features observed  
137 experimentally: (i) chromosomes fold into a loose polymer brush<sup>3,36,37</sup>, with a Rec8-rich core<sup>3</sup> (**Fig.**  
138 **3f, Extended Data Fig. 5 a**); (ii) a grid-like interaction pattern naturally emerges in simulated Hi-  
139 C maps (**Fig. 3d**); (iii) importantly, because loop extrusion is a *cis*-acting process, pairs of Rec8  
140 sites at increasing separations naturally have lower contact frequency (**Fig. 3e**).

141

142 Simulations also highlight the stochasticity of loop positions across the cell population, with most  
143 barriers (73%) unoccupied by an extruder, and extruders paused with barrier elements on both  
144 sides only a minority of the time (15%) in the best fitting models (**Extended Data Fig. 6 c**).  
145 Because of this, the majority (65%) of extruded loops cross over Rec8 sites, consistent with an  
146 average loop size roughly twice the average distance between Rec8 ChIP peaks (26 kb versus  
147 12 kb, **Extended Data Fig. 6 d**), and remarkably consistent with estimates made using EM  
148 (~20kb<sup>36</sup>). Most strikingly—despite the prominence of Rec8-dependent grid-like features in the  
149 experimental data (**Fig. 2c**)—our simulations indicate that Rec8 sites are not always occupied by  
150 extruding cohesins and thus are present at the meiotic chromosome core in only a subset of cells,  
151 as inferred previously<sup>38</sup>.

152

153 The range of loop extrusion parameters we explored encompasses the situation where Rec8 sites  
154 always halt extrusion and *cis*-loops are formed between each consecutive Rec8 site. However,  
155 simulations with these parameters have quantitatively poor fits with experimental maps (**Fig. 3d-**  
156 **e, ii**): the bend in  $P(s)$  comes too early to recapitulate experimental  $P(s)$ , and Rec8-Rec8 contacts  
157 are much too strong. The poor fit of such 'direct-bridging' simulations underscores the conclusion  
158 that only a fraction of Rec8 sites are occupied in a given cell, and argues that cohesin-dependent  
159 *cis*-loops must link regions that are not primary Rec8 binding sites in order to provide compaction  
160 without making Rec8-Rec8 enrichments overly strong.

161

162 A crucial prediction of our loop extrusion simulations is that depletion of extruders in meiosis would  
163 lead to both decompaction and loss of the grid-like pattern of Hi-C interactions. When we repeated  
164 our fitting procedure for *rec8Δ*, the best fits were for simulations with either no, or very few,  
165 extruded loops (**Extended Data Fig. 5e**). The lack of compaction in these simulations (**Extended  
166 Data Fig. 5a**) is consistent with previous EM showing decompacted chromatids in *rec8Δ*<sup>3</sup>. Such  
167 joint consistency between Hi-C and imaging data further supports loop extrusion as a mechanism  
168 underlying assembly of the cohesin-rich core and contributing to chromosomal compaction in  
169 meiosis. Our simulations also open the possibility that overly-shortened axes observed upon  
170 *Wapl*<sup>39,40</sup> and *Pds5*<sup>41</sup> depletion may reflect heightened extruder processivity<sup>42</sup> upon which  
171 shortened SCs are assembled, and predict that such perturbations would cause a rightward shift  
172 in the  $P(s)$  shoulder measured via Hi-C (**Extended Data Fig. 5c**).

173

174 To investigate how homologue synapsis affects chromosome conformation, we assayed  
175 pachytene cells in the absence of Zip1, the transverse filament of the SC<sup>4</sup>, and Hop1, an axial  
176 element required for Zip1 loading<sup>6</sup> (**Fig. 4a,b**). Both *zip1Δ* and *hop1Δ* Hi-C maps retained the  
177 Rec8-dependent punctate interactions (**Fig. 4b, Extended Data Fig. 2b,c**), and displayed  
178 compaction relative to G1 or *rec8Δ*, but with the  $P(s)$  shoulder shifted left relative to *ndt80Δ* (**Fig.  
179 4c**). Attempts to model the known *zip1Δ* and *hop1Δ* defects in chromosome synapsis simply by  
180 removing interhomologue crosslinks from best-fitting *ndt80Δ* simulations did not recapitulate the  
181  $P(s)$  shift observed experimentally (**Extended Data Fig. 5 f**), consistent with the suggestion that  
182 interhomologue contacts make only a minor contribution within meiotic Hi-C maps<sup>23</sup>. Instead,  
183 best-fitting simulations had shifts towards slightly lower processivity and larger separation,  
184 consistent with less axial compaction relative to the *ndt80Δ* control (**Fig. 4e**). Interestingly,  
185 subtelomeric regions no longer displayed a distinct  $P(s)$  in *zip1Δ* and *hop1Δ* (**Fig. 4d**), suggesting  
186 that chromosome compaction at chromosome termini is regulated differentially.

## 187 Discussion

188 Our analysis of meiotic chromosome organisation via Hi-C reconciles the function and localisation  
189 of factors thought to shape meiotic chromosomes with their 3D organisation, revealing the  
190 emergence of a punctate grid of interactions concomitant with initial stages of meiotic  
191 chromosome compaction. Crucially, we formally demonstrate the link between preferential  
192 positioning of meiotic cohesin along the genome<sup>27,35</sup> and the inference that these loci come into  
193 close proximity based on the localization of Rec8 to the chromosomal axes<sup>3</sup>. Remarkably, the

194 punctate cohesin-dependent interactions in yeast meiosis emerge despite the absence of CTCF  
195 in this organism; this challenges previous models where focal Hi-C peaks are strictly dependent  
196 on CTCF<sup>24,31,43</sup>, and indicates that alternative mechanisms of loop positioning must exist.

197

198 Notably, whilst much less prominent, locus-specific folding is evident in equivalent high-resolution  
199 Hi-C maps of mitotic cells (**Extended Data Fig. 7**)—something that was hidden within lower-  
200 resolution analyses<sup>19,21</sup>. The correspondence between cohesin positioning and convergent  
201 transcription in both meiosis<sup>35</sup> and mitosis<sup>44,45</sup> argues that transcription may be a fundamental and  
202 ubiquitous process capable of broadly patterning locus-specific chromosome organisation by  
203 modulation of cohesin dynamics<sup>46</sup>. Indeed, the stronger meiotic patterns are particularly  
204 reminiscent of the extended grid-like Hi-C patterns observed in interphase mammalian cells upon  
205 depletion of the cohesion unloader, Wapl<sup>31,47</sup>, wherein “vermicelli”-like chromatids arise with a  
206 cohesin-rich backbone<sup>48</sup>, emphasising the influence of cohesin dynamics on loop extrusion. We  
207 favour the view that transcription acts as a barrier to cohesin-dependent loop extrusion, rather  
208 than as a motive force as previously proposed<sup>35,49,50</sup>, consistent with transcription-independent  
209 compaction by cohesin in mammalian interphase<sup>47</sup> and direct observation of extrusion by the  
210 related SMC condensin *in vitro*<sup>51</sup>.

211

212 Consistent with the idea that large DNA-protein complexes, like a kinetochore, can impede  
213 extrusion, we observe a paucity of Rec8-dependent loops spanning the centromere.  
214 Nevertheless, whether barriers arise directly from Pol2 binding, or indirectly via other axis  
215 proteins, remains to be determined. Indeed, the reason for the why loops are more strictly  
216 positioned in meiosis compared to mitosis is intriguing. However, our observations enable us to  
217 rule out the axial element, Hop1, the SC lateral element, Zip1, and the process of homologous  
218 recombination mediated by Spo11, Sae2, and Dmc1 (**unpub. obs.**) as important for the generation  
219 of such patterns.

220

221 Our simulations also reveal a nuanced picture of meiotic chromosome assembly: loops are, on  
222 average, larger than the inter-Rec8 peak distance, and more than half of the loop bases are not  
223 associated with preferred sites of Rec8 binding. Moreover, it is likely that loop sizes and positions  
224 vary widely from one cell to another, making classifications of genomic regions as ‘axis’ or ‘loop’  
225 a great oversimplification. The agreement between our simulations and experimental data furthers  
226 the case for loop extrusion as a general mechanism<sup>19–21,23,28,52–55</sup> that is flexibly employed and  
227 regulated in interphase, mitosis, and meiosis.

228

229 Our results also reveal how the interplay between the synapsis components, Hop1 and Zip1,  
230 influences chromosome morphology. That Hop1 and Zip1 are both required to increase  
231 chromosome compaction at pachytene likely points at their joint role in promoting synapsis<sup>4,6</sup>, and  
232 supports the view that synapsis itself modulates axial compaction. Interestingly, whilst Zip1 binds  
233 largely uniformly along the arms of pachytene chromosomes<sup>56</sup>, subtelomeres and short  
234 chromosomes display an increase in short-range contacts and an earlier shoulder in  $P(s)$ ,  
235 consistent with smaller loops or less compression of spacers between loops in these regions, and  
236 therefore less axial compaction. Because such differences correlate with disproportionate  
237 retention of Hop1 in these regions<sup>56</sup> and diminished efficiency of synapsis<sup>57</sup>, it is possible that  
238 Hop1 impedes the pathway whereby Zip1 imposes additional compaction upon synapsis.  
239 Nevertheless, it is unclear whether Zip1 mediates this effect by modifying loop extrusion  
240 dynamics, or via a distinct process of axial compression, as has been argued for higher eukaryote  
241 mitotic chromosome compaction<sup>20</sup>. Given the influence that chromosome structure has over so  
242 many aspects of meiosis, teasing apart these mechanisms is of great future interest.

243

## 244 Acknowledgements & Contributions

245 SAS and MJN planned the study, performed wet-lab work and data analysis. GF and KSP  
246 developed polymer simulations and performed data analysis. SAS, GF, JB, KSP and MJN  
247 discussed results and wrote the manuscript. We thank Tim Cooper for deploying the HiC Pro  
248 installation, Scott Keeney and Franz Klein for sharing *S. cerevisiae* strains, Svetlana Lyalina for  
249 assistance with QB3 GPUs, Anton Goloborodko for suggesting the use of *looplib*, and Nezar  
250 Abdennur for feedback.

251

## 252 Data & Code Availability

253

254 All processed Hi-C matrices are publicly accessible via the interactive HiGlass viewer<sup>58</sup>. Live web  
255 links are provided with each figure. Raw sequence reads will be made publicly accessible via the  
256 SRA repository upon final publication. Code for data analysis is either already publicly available  
257 online or will be made available on request or via Github upon final publication.



258

## 259 Funding Statement

260 SS and MJN are supported by an ERC Consolidator Grant (#311336), the BBSRC  
261 (#BB/M010279/1) and the Wellcome Trust (#200843/Z/16/Z). KP and GF are supported by NIMH  
262 grant #MH109907, NHLBI grant #HL098179, and the San Simeon Fund.

263

264

## 265 Figure Legends

266 **Figure 1.** Chromosome conformation during yeast meiosis.

267 **a.** Cells were collected during meiosis at indicated timepoints and analysed by Hi-C. At 0h the  
268 cells are in G1. Representative Hi-C contact maps of chromosomes 6, 11, and 7 plotted at 5 kb  
269 resolution. Centromeres, telomeres and arm fold-back at the centromere are indicated by blue,  
270 red and grey arrows, respectively, and axial compaction by the width of the main diagonal relative  
271 to the fixed-width black clamp. For interactive HiGlass<sup>58</sup> views see:  
272 <http://higlass.pollard.gladstone.org/app/?config=Z5iwKpjzQpePCXXyvuYGeQ>

273 **b.** Meiotic entry assessed by FACS; at 4h, the majority of cells show a 4C peak indicating  
274 completion of DNA replication.

275 **c.** Meiotic progression was monitored by quantification of nuclear divisions determined by DAPI  
276 staining. Around 4h, cells start to undergo meiotic divisions I and II. The majority of cells undergo  
277 meiotic divisions between 4h and 8h, indicating the degree of heterogeneity within the cell  
278 population.

279 **d.** *Upper panels:* Average *trans* centromere-centromere contact maps. *Lower panels:* *trans*  
280 telomere-telomere contact maps. *Right:* ratio of *cis* to total contact frequency.

281 **e.** Intra-arm contact probability versus genomic distance,  $P(s)$ , indicating the emergence (*left*) and  
282 disappearance (*right*) of chromosome arm compaction during meiosis. Shaded area bounded  
283 above and below by the two *ndt80Δ* 8h replicates.

284 **f.** Meiosis was induced in *ndt80Δ* cells for 8h and meiotic entry was checked by monitoring DNA  
285 replication by FACS.

286 **g.** *ndt80Δ* cells were grown for 8h in sporulation media and analysed by Hi-C (*left*). Log2 ratio of  
287 *ndt80Δ* cells 8h over G1 (*right*). Centromeres and telomeres are indicated by blue and red arrows,  
288 respectively, and axial compaction by a black clamp.

289 **h.** *Left*: Contact probability of individual chromosome arms stratified by length. *Right*: Contact  
290 probability stratified by the distance from the telomere.

291 **Figure 2. Emergence of a Rec8-dependent grid of punctate interactions in meiosis**

292 **a.** Hi-C contact maps of chromosome 11 for the indicated genotypes plotted at 2 kb bin resolution,  
293 showing near-diagonal interactions. Wild type timepoints as in **Fig. 1a**. **Lower panels**:  
294  $\log_2(\text{insulation})$ ; cis/total ratio, Rec8 ChIP-seq<sup>27</sup>, all binned at 2kb. Insulation and cis/total  
295 calculated from *ndt80Δ* maps. Positions of Rec8 sites indicated as green circles. Genome-wide  
296 cis/total (Spearman's  $R=0.62$ ,  $P<1e-10$ ) and insulation ( $R=-0.23$ ,  $P<1e-10$ , insulation window =  
297 20 kb) profiles are correlated with Rec8 occupancy.

298 **b.** Zoom-in into contact maps on chromosome 11 (0-200kb) of wt-4h and *ndt80Δ* (top) and *rec8Δ*  
299 (*bottom left*). Contact probability versus genomic distance,  $P(s)$ , for G1(*ndt80Δ-0h*) and *ndt80Δ*  
300 and *rec8Δ* (*bottom right*). Data shown is the average ( $n=2$ ) except for wt-4h. Rec8 peak sites  
301 called from ChIP-seq data<sup>27</sup> are indicated in green. For an interactive view see:  
302 <http://higlass.pollard.gladstone.org/app/?config=Twrh61jGT4SlxotaguTIJg>

303 **c.** Simplified illustration of how a grid of peaks on a Hi-C map can emerge between Rec8 sites  
304 either by transitive contacts between adjacent loops, or by loops that skip over adjacent sites.  
305 Experimentally observed grids extend much further than separation=2 (**Extended Data Fig. 4c**)

306 **d.** Cis/total ratios for Rec8 (green) and nonRec8 (grey) sites for indicated datasets.

307 **e.** Contact frequency versus distance between Rec8-Rec8 sites (green), Rec8-nonRec8 sites  
308 (light green) and nonRec8-nonRec8 sites (grey).

309 **f.** Log2 ratio of contact frequency between adjacent Rec8-sites (separation=1) compared to  
310 average cis interactions.

311 **g.** Log2 ratio of contact frequency centered at Rec8 sites compared to average cis interactions.  
312 In *ndt80Δ*, Rec8 sites show: elevated cis/total frequency (0.85 versus 0.77), elevated pairwise  
313 contact frequency (~2-fold at 20 kb), and mild insulation (**f-g**). These distinctions are similar in  
314 wild type pachytene (4h) yet absent in G1 (*ndt80Δ-0h*) or in *rec8Δ*.

315 **Figure 3. Modelling meiotic chromosome compaction.**

316 **a.** In simulations, yeast chr13 was represented as a polymer fiber confined to the nucleus subject  
317 to additional meiosis-specific constraints. These include: extruded loops, sister crosslinks, and  
318 homolog crosslinks (**Methods**). Barriers to extruded loops were placed at Rec8 sites<sup>27</sup>. We  
319 imposed inter-sister and inter-homologue crosslinks at sites of extruded loop bases in order to  
320 approximate the paired arrangement of homologues at pachytene (**Extended Data Fig. 6**). For  
321 each set of extruded loop parameters (*processivity*, *separation*, and *barrier strength*),  
322 conformations were collected and used to generate simulated contact maps. Roughly,  
323 *processivity* dictates the size of an extruded loop unimpeded by collisions, *separation* controls the  
324 number of active extruders on the chromosome, and *barrier strength* controls the probability that  
325 an extruder gets paused when attempting to step past a barrier. Simulated and experimental  
326 contact maps were then compared via the combined average fold discrepancy between  $P(s)$   
327 curves for Rec8-Rec8, Rec8-non, and non-non bin pairs at 2kb resolution.

328 **b.** Goodness-of-fit for indicated barrier strengths over coarse grids of processivity and separation  
329 demonstrate that intermediate barrier strengths are required to agree with experimental *ndt80Δ*  
330 Hi-C maps.

331 **c.** Goodness-of-fit for a fine grid of processivity versus separation at barrier strength 0.95. Best-  
332 fitting models had separation ~32kb and processivity ~76kb, corresponding to ~60% coverage of  
333 the genome by extruded loops of average length 26kb.

334 **d.** From *left to right*: contact maps for chr13 for *ndt80Δ*, and simulations with (i) best-fitting  
335 parameters, (ii) relatively stable loops between neighboring Rec8 sites, and (iii) no barriers.

336 **e.**  $P(s)$  split by Rec8-Rec8, Rec8-non, and non-non, as in **Fig. 2D**.

337 **f.** Conformations for best-fitting simulations, which highlight: (*left*) one chromatid colored from  
338 start (red) to end (blue); (*right*) extruders (yellow), extrusion barriers (red), and extruders paused  
339 at barriers (orange).

340 **Figure 4. Hop1 and Zip1-dependent compaction of Rec8-dependent loops.**

341 **a.** *Top*: Hi-C maps for *hop1Δ* and *zip1Δ* (plotted as in **Fig. 1a**). *Bottom*: Log<sub>2</sub> ratio of *hop1Δ* over  
342 *ndt80Δ* (as in **Fig. 1g**). For interactive views of the full genome, see  
343 <http://higlass.pollard.gladstone.org/app/?config=TTBGU5DDR0SHAa09zrjTXA>

344 **b.** Hi-C contact maps of chromosome 11 for *hop1Δ* and *zip1Δ* plotted at 2kb bin resolution,  
345 showing near-diagonal interactions, as in **Fig. 2a**.

346 **c.** Contact probability versus genomic distance for G1, *ndt80Δ*, *hop1Δ*, *zip1Δ*. Shaded area  
347 bounded above and below by *ndt80Δ* replicas. Average between two replicas for *zip1Δ* and one  
348 sample for G1 and *hop1Δ* are shown.

349 **d.** Contact probability over genomic distance averaged over all chromosome arms stratified by  
350 distance from the telomere.

351 **e.** Goodness-of-fit for simulations without homolog crosslinks with a fine grid of processivity  
352 versus separation at barrier strength 0.95 *zip1Δ* and *hop1Δ*.

353 **f.** Model of meiotic chromosome compaction: Rec8-dependent loop formation leads to initial  
354 chromosome arm compaction and emergence of a grid-like pattern of Hi-C interactions that jointly  
355 agrees with a mechanism of loop extrusion including barrier elements. We suggest that  
356 transcription could impose such barriers. Hop1 and Zip1 are dispensable for this step, but are  
357 required for synapsis, where additional compaction occurs differentially along chromosome arms.  
358

#### 359 **Extended Data Fig. 1**

##### **Temporal and chromosome length-specific analysis of meiotic chromatin conformation**

360 **a-d.** Results from a replicate timecourse, collected and characterized independently of the  
361 timecourse in Fig. 1.

362 **a.** Hi-C maps, plotted as in Fig. 1a.

363 **b.** FACS as in Fig. 1b.

364 **c.** DAPI as in Fig. 1c.

365 **d.**  $P(s)$  as in Fig. 1e.

366 **e.**  $P(s)$  for chromosomes stratified by size for *ndt80Δ*-0h, *ndt80Δ*-8h. Short chromosomes display  
367 relatively elevated  $P(s)$  at short distances, and an earlier shoulder.

368 **f.** *Left:*  $P(s)$  for individual chromosome arms, stratified by size for wt-4h. Short arms display  
369 relatively elevated  $P(s)$  at short distances, and an earlier roll-over. *Right:* Intra-arm  $P(s)$  stratified  
370 by the distance from the telomere for wt-4h, averaged across all chromosomes. Telomere-  
371 proximal regions display elevated  $P(s)$  at short distances.

372 **g.** Intra-arm  $P(s)$  stratified by the distance from the centromere for G1 (*ndt80Δ*-0h), wt-4h, *ndt80Δ*-  
373 8h, averaged across all chromosomes.

374 **h.** Contact probability of single chromosome arms for *ndt80Δ*-8h.

#### 375 **Extended Data Fig. 2**

##### **Aggregate analysis of centromeric interactions in meiosis**

376 **a.** Average *trans* centromere-centromere contact maps for indicated data sets.

377 **b.** Average *cis* centromere-centromere contact maps for indicated data sets. Note the loss of the  
378 folding back in meiosis, and how the intra-arm enrichment is insulated at centromeres in meiosis.

379 **Extended Data Fig. 3**

**Aggregate analysis of telomeric interactions in meiosis**

380 **a.** Average *trans* telomere-telomere contact maps for indicated datasets.

381 **b.** Average telomere-telomere contact maps between the two telomeres of the same  
382 chromosome.

383 **c.** Average contact map around each telomere in *cis*.

384 **Extended Data Fig. 4**

**Preferred sites of Rec8 occupancy define sites of locus-specific interaction**

385 **a.** *Left:* Hi-C contact maps of *rec8Δ ndt80Δ*. Chromosomes 6, 11 and 7 are shown as  
386 representatives for the whole genome. *Right:* Log<sub>2</sub> Hi-C ratio maps of *rec8Δ ndt80Δ / ndt80Δ*.  
387 Plotted as in Fig. 1g.

388 **b.** Log<sub>2</sub> observed over expected contact frequency at Rec8-Rec8 peak pairs as a function of  
389 separation across datasets.

390 **c.** Log<sub>2</sub> observed over expected contact frequency +/-8kb around Rec8-Rec8 peak pairs at the  
391 indicated separations.

392 Together, **b-c** demonstrate that Rec8-Rec8 enrichments are strongest between adjacent sites,  
393 decrease between non-adjacent sites with increasing genomic separation, and are absent in  
394 *trans*. Equally important, these meiotic features are lost in *rec8Δ*. As for mammalian interphase,  
395 this observation in meiosis argues for a *cis*-acting process underlying the formation of focal  
396 interactions between Rec8 sites.

397 **d.** *cis*/total as a function of distance along the chromosomal arm, Rec8 sites marked in green.

398

399 **Extended Data Fig. 5**

**Polymer simulations of loop extrusion reveal best fitting parameters and conformations**

400 **a.** Representative conformation for the indicated parameter sets. As in **Fig. 3F**, one chromatid  
401 from a homologous quartet of chromatids colored from start to end according to the spectrum;  
402 other three colored in grey.

403 **b.** For the same three conformations, positions of Rec8 sites indicated with red spheres, positions  
404 of extruded loop bases in yellow, and extruders overlapping a Rec8 site in orange. Note the stable  
405 loops between neighboring Rec8 sites creates a very elongated chromatid (ii). Also note the

406 majority of Rec8 sites are unoccupied in (iii), despite the self-assembly of two axial cores and a  
407 strong brush. Finally, note very dispersed chromosomes in (iv), consistent with EM<sup>3</sup> for *rec8Δ*.  
408 **c.** Contact frequency versus distance,  $P(s)$ , for indicated simulations. Note that the loss of the  
409 shoulder in  $P(s)$  in the case of full extruder depletion mirrors the difference between experimental  
410 *ndt80Δ* and *rec8Δ* Hi-C maps. Simulations with increased processivity predict that  $P(s)$  would shift  
411 rightward if unloading was impaired, as could happen in *wap1Δ*. Conversely, if unloading was  
412 enhanced, simulations with decreased processivity indicate a leftward shift in  $P(s)$ , until the  
413 absence of extruders.  
414 **d.** Goodness-of-fit for a fine grid of processivity versus separation at barrier strength 0.90. The  
415 best-fit occurs at similar processivity and separation as for barrier strength 0.95 shown in **Fig. 3c**,  
416 but with slightly lower goodness-of-fit.  
417 **e.** Goodness-of-fit to *rec8Δ* data for simulations with the indicated barrier strengths (in grey: 0.00,  
418 0.75, 0.90, 0.95, 0.99, 1.00) over coarse grids of processivity and separation demonstrates that  
419 the best fits have few if any extruded loops, regardless of barrier strength.  
420 **f.**  $P(s)$  curves for simulations with sisters and homologs with the best-fitting parameters for  
421 *ndt80Δ-8h* maps compared to  $P(s)$  for simulations with sisters only show that simply removing  
422 homolog tethering does not recapitulate the sort of shifted  $P(s)$  seen experimentally in *zip1Δ* Hi-  
423 C.  
424

#### 425 **Extended Data Fig. 6**

##### **Polymer simulations of loop extrusion elucidate meiotic barrier strength**

426 **a.** Simulated contact maps for the indicated region of chr13 for: (i) best-fitting simulations, (ii)  
427 simulations with relatively stable loops between neighboring Rec8 sites (barrier strength=1 and  
428 high processivity), and (iii) no barriers, as in **Fig. 2d**.  
429 **b.** Simulated ChIP-seq profiles for the indicated region of chr13. Best-fitting simulations (i) display  
430 occupancy well below 100% at Rec8 sites. Simulations with stable loops (ii) display highly  
431 occupied Rec8 sites. Simulations without barriers (iii) have homogenous Rec8 occupancy across  
432 the genome.  
433 **c.** Positions of extruded loops (arcs) sister crosslinks (solid black lines) and homolog crosslinks  
434 (dashed lines) for four chromatids in two separate cells, showing how the simulated Hi-C maps  
435 and ChIP-seq profiles emerge from the stochastic positioning of extruded loops from cell-to-cell.  
436 For statistics, see **Supplementary Table S1**.  
437 **d.** Histogram of extruded loop lengths for indicated parameters (i, ii, iii).  
438

439 **Extended Data Fig. 7**

**Cohesin and transcription patterns loops in meiosis and mitosis**

440 **a.** Hi-C contact maps of chromosome 11 for meiotic (*ndt80Δ*, pachytene - top) and mitotic (wild  
441 type, nocodazole arrest - bottom) plotted at 2 kb bin resolution, showing near-diagonal  
442 interactions. Data shown is the average (n=2).

443 **b.** Zoom-in into contact maps on chromosome 11 (0-200kb) of *ndt80Δ* (top) and mitotic (*bottom*).  
444 Data shown is the average (n=2). Rec8 peak sites called from ChIP-seq data<sup>27</sup> are indicated in  
445 green. Arrowheads indicate sites of prominent focal interaction.

446

447 **Tables**

448

449

**Table 1. *S. cerevisiae* strains used in this study**

| Strain name | genotype                                                                                                                                                                                                                      |
|-------------|-------------------------------------------------------------------------------------------------------------------------------------------------------------------------------------------------------------------------------|
| MJ6         | ho::LYS2 <sup>+</sup> , lys2 <sup>+</sup> , ura3 <sup>+</sup> , arg4-nsp <sup>+</sup> , leu2::hisG <sup>+</sup> , his4X::LEU2 <sup>+</sup> ,<br>nuc1::LEU2 <sup>+</sup>                                                       |
| SSY14       | ho::LYS2 <sup>+</sup> , lys2 <sup>+</sup> , ura3 <sup>+</sup> , arg4-nsp <sup>+</sup> , leu2::hisG <sup>+</sup> , his4X::LEU2 <sup>+</sup> ,<br>nuc1::LEU2 <sup>+</sup> , ndt80Δ::LEU2 <sup>+</sup>                           |
| SSY20       | ho::LYS2 <sup>+</sup> , lys2 <sup>+</sup> , ura3 <sup>+</sup> , arg4-nsp <sup>+</sup> , leu2::hisG <sup>+</sup> , rec8Δ::KanMX4 <sup>+</sup> ,<br>ndt80Δ::LEU2 <sup>+</sup>                                                   |
| SSY25       | ho::LYS2 <sup>+</sup> , lys2 <sup>+</sup> , ura3 <sup>+</sup> , arg4-nsp <sup>+</sup> , leu2::hisG <sup>+</sup> , his4X::LEU2 <sup>+</sup> ,<br>nuc1::LEU2 <sup>+</sup> , zip1::LEU2 <sup>+</sup> , ndt80Δ::LEU2 <sup>+</sup> |
| SSY49       | ho::LYS2 <sup>+</sup> , lys2 <sup>+</sup> , ura3 <sup>+</sup> , arg4-nsp <sup>+</sup> , leu2::hisG <sup>+</sup> , nuc1::LEU2 <sup>+</sup> ,<br>his4X::LEU2 <sup>+</sup> , hop1::LEU2 <sup>+</sup> , ndt80Δ::LEU2 <sup>+</sup> |
| SSY58       | ho::hisG <sup>+</sup> , lys2 <sup>+</sup> , ura3 <sup>+</sup> , leu2::hisG <sup>+</sup> , nuc1::LEU2 <sup>+</sup> , arg4-nsp <sup>+</sup> ,<br>rec8::KanMX <sup>+</sup> , ndt80Δ::LEU2 <sup>+</sup>                           |

450

451 **Table 2. Hi-C Libraries**

| <b>Name</b>              | <b>mutations</b>             | <b>Sample name</b>           | <b>valid pairs (M)</b> |
|--------------------------|------------------------------|------------------------------|------------------------|
| <b>Main figures</b>      |                              |                              |                        |
| wt-0h/G1                 |                              | HiC_MJ6_wt_2A_0h             | 14.5                   |
| wt-2h                    |                              | HiC_MJ6_wt_2A1_2h            | 27.6                   |
| wt-3h                    |                              | HiC_MJ6_wt_2A_3h             | 24.1                   |
| wt-4h                    |                              | HiC_MJ6_wt_2A_4h             | 28                     |
| wt-5h                    |                              | HiC_MJ6_wt_2A1_5h            | 27.6                   |
| wt-6h                    |                              | HiC_MJ6_wt_2A1_6h            | 27.6                   |
| wt-8h                    |                              | HiC_MJ6_wt_2A3_8h            | 19                     |
| <i>rec8</i> Δ            | <i>rec8</i> Δ <i>ndt80</i> Δ | average                      |                        |
| <i>rec8</i> Δ replica 1  | <i>rec8</i> Δ <i>ndt80</i> Δ | HiC_SSY20_ndt80Drec8D_1A2_8h | 39.3                   |
| <i>rec8</i> Δ replica 2  | <i>rec8</i> Δ <i>ndt80</i> Δ | HiC_SSY58_ndt80Drec8D_2A_8h  | 20.2                   |
| <i>ndt80</i> Δ           | <i>ndt80</i> Δ               | average, 8h                  |                        |
| G1                       | <i>ndt80</i> Δ               | HiC_SSY14_ndt80D_1A2_0h      | 36                     |
| <i>ndt80</i> Δ-4h        | <i>ndt80</i> Δ               | HiC_SSY14_ndt80D_1A_4h       | 11.9                   |
| <i>ndt80</i> Δ replica 1 | <i>ndt80</i> Δ               | HiC_SSY14_ndt80D_1A1_8h      | 22.9                   |
| <i>ndt80</i> Δ replica 2 | <i>ndt80</i> Δ               | HiC_SSY14_ndt80D_2A2_8h      | 37                     |
| <i>zip1</i> Δ            | <i>zip1</i> Δ <i>ndt80</i> Δ | average                      |                        |
| <i>zip1</i> Δ replica 1  | <i>zip1</i> Δ <i>ndt80</i> Δ | HiC_SSY25_ndt80Dzip1D_1B2_8h | 22.7                   |
| <i>zip1</i> Δ replica 2  | <i>zip1</i> Δ <i>ndt80</i> Δ | HiC_SSY25_ndt80Dzip1D_2A_8h  | 28.6                   |



|                              |                     |                             |      |
|------------------------------|---------------------|-----------------------------|------|
| <i>hop1Δ</i>                 | <i>hop1Δ ndt80Δ</i> | hop1 ndt80                  |      |
| <i>hop1Δ</i> replica1        | <i>hop1Δ ndt80Δ</i> | HiC_SSY49_ndt80Dhop1D_1A_8h | 32.8 |
| <b>Supplementary figures</b> |                     |                             |      |
| wt-2h                        |                     | HiC_MJ6_wt_3A_2h            | 22.5 |
| wt-3h                        |                     | HiC_MJ6_wt_3A_3h            | 19.8 |
| wt-4h                        |                     | HiC_MJ6_wt_3A_4h            | 16.7 |
| wt-6h                        |                     | HiC_MJ6_wt_3A_6h            | 37.6 |

452

453 **Table 3. Overview of proteins described in this study**

| <b>Protein</b> | <b>Description</b>                                    |
|----------------|-------------------------------------------------------|
| Ndt80          | Transcription factor required for exit from pachytene |
| Rec8           | Meiosis-specific kleisin subunit of cohesin           |
| Hop1           | Axial element of the synaptonemal complex             |
| Zip1           | Transverse filament of the synaptonemal complex       |

454

455

456

## 457 Methods

### 458 Yeast strains and cell culture growth.

459 Strains used in this study were derived from SK1 and are listed in Table 1.

### 460 Monitoring meiotic progression by flow cytometry and quantification of nuclear divisions

461 Cells were fixed in 70% EtOH, digested with 1 mg/ml RNAse (10 mM Tris-HCl pH 8.0, 15 mM  
462 NaCl, 10 mM EDTA pH 8.0) for 2 h at 37 °C, 800 rpm and subsequently treated with 1 mg/ml  
463 Proteinase K in 50 mM Tris-HCl pH 8.0 at 50 °C, 800 rpm for 30 min for analysis by FACS. Cells  
464 were then washed in 50 mM Tris-HCl pH 8.0 and stained in the same buffer with 1 uM Sytox  
465 green overnight in the fridge. FACS profiles were plotted with R using the library *hwglabr2*  
466 (<https://github.com/hochwagenlab/hwglabr2>). Fixed cells were also used for quantification of  
467 nuclear divisions by spreading onto a microscope slide, mounting with Fluoroshield containing  
468 DAPI followed by analysis with a Zeiss Scope.A1 microscope.

### 469 Hi-C library preparation

470 The Hi-C protocol used was amended from<sup>59</sup> by ~5-fold reduction in all materials and volumes.  
471 Briefly, *S. cerevisiae* diploid cells were synchronised in G1 by growth at 30 °C for ~15 h in 30 ml  
472 YPA (1% Yeast extract, 2% Peptone, 1% K-acetate) to OD600 of ~4, harvested, washed, and  
473 resuspended in prewarmed sporulation medium (2% KAc with 0.2x nutritional supplements)  
474 before fixing 5 ml aliquots (20-30 ODs) of relevant timepoints with formaldehyde at 3% final  
475 concentration for 20 min at 30 °C, 250 rpm, then quenched by incubating with a final concentration  
476 of 0.35 M Glycine (2x the volume of Formaldehyde added) for an additional 5 minutes. Cells were  
477 washed with water split into two samples and stored at -80°C ready for library preparation. Cells  
478 were thawed, washed in spheroplasting buffer (SB, 1 M Sorbitol, 50 mM Tris pH 7.5) and digested  
479 with 100 ug/ml 100T Zymolyase in SB containing 1% beta-Mercaptoethanol for 15-20 min at 35  
480 °C. Cells were washed in restriction enzyme buffer, chromatin was solubilised by adding SDS to  
481 0.1% and incubating at 65 °C for 10 minutes. Excess SDS was quenched by addition of Triton  
482 X100 to 1%, and chromatin was incubated with 2.07U/ul of *DpnII* overnight at 37 °C. DNA ends  
483 were filled in with nucleotides, substituting dCTP for biotin-14-dCTP using Klenow fragment DNA  
484 polymerase I at 37 °C for 2 h followed by addition of SDS to 1.5% and incubation at 65 °C for 20  
485 min to inactivate Klenow and further solubilise the chromatin. The sample volume was diluted 15-

486 fold, crosslinked DNA ends ligated at 16 °C for 8 h using 0.024U/ul of T4 DNA ligase, and  
487 crosslinks reversed by overnight incubation at 65 °C in the presence of proteinase K. DNA was  
488 precipitated with ethanol, dissolved in TE and passed through an Amicon 30 kDa column. DNA  
489 was further purified by phenol:chloroform:isoamylalcohol extraction and precipitated again before  
490 treating with RNaseA at 37 °C for 1 h. Biotin was removed from unligated ends by incubation with  
491 T4 DNA polymerase at 20°C for 4 h and at 75 °C for 20 min for inactivation of the enzyme. DNA  
492 was subsequently fragmented using a Covaris M220 (Duty factor 20%, 200 cycles/burst, 350s,  
493 20 °C), and DNA ends were repaired and A-tailed using T4 DNA polymerase, T4 Polynucleotide  
494 Kinase and Klenow fragment DNA polymerase I before isolating fragments of 100-250 bp using  
495 a Blue Pippin (Sage). Biotinylated fragments were enriched using streptavidin magnetic beads  
496 (C1) and NextFlex (Bioo Scientific) barcoded adapters were ligated while the DNA was on the  
497 beads. Resulting libraries were minimally amplified by PCR and sequenced using paired end 42  
498 bp reads on a NextSeq500 (Illumina; Brighton Genomics).

#### 499 **Hi-C data processing and analysis**

500 Hi-C sparse matrices were generated at varying spatial resolutions using the Hi-C-pro pipeline<sup>60</sup>,  
501 using a customised S288c reference genome (*SK1Mod*, in which high confidence SK1-specific  
502 polymorphisms were inserted in order to improve read alignment rates; [manuscript in preparation](#))  
503 and plotted using R Studio (version 1.0.44) after correcting for read depth differences between  
504 samples. Raw read statistics are presented in [Table 2](#). Repeat biological samples gave broadly  
505 similar matrices and, unless indicated otherwise, were averaged to improve their expected  
506 quantitative accuracy. As visual inspection indicated a number of potential translocations in the  
507 SK1 strain as compared with the S288c reference genome, for conservative downstream  
508 analyses, additional bins were masked if they contained potential translocations. Such bins were  
509 identified if they either had values in *trans* at the level of the median of the third diagonal in *cis*, or  
510 the maximum value in *trans* exceeded the maximum value in *cis* for SSY14 for bins displaying  
511 these properties in either *ndt80D-0h* or in *ndt80D-8h* and for MJ6 in *wt-0h* or *wt-4h*. chr1 was  
512 excluded from downstream analysis as few informative bins remained after filtering potential  
513 translocations.

514

515 Average maps centered at centromeres and telomeres were calculated as in<sup>61</sup>, ensuring that  
516 collected patches for average centromere maps did not extend inter-chromosomally, and  
517 collected patches for average telomere maps did not extend beyond centromeres or inter-  
518 chromosomally. Contact frequency versus distance curves,  $P(s)$ , were calculated from 2 kb

519 binned maps, with logarithmically-spaced bins in  $s$  (numutils.logbins, [https://bitbucket.org /](https://bitbucket.org/mirnylab/mirnylib)  
520 [mirnylab/mirnylib](https://bitbucket.org/mirnylab/mirnylib), start =2, end = max(binned arm lengths), N=50), and restricting the calculation  
521 to bin pairs within chromosomal arms and excluding bins less than 20 kb from centromeres or  
522 telomere (as in<sup>61</sup>), and normalized to the average value at 4 kb.  $P(s)$  stratified by distance to  
523 telomeres was calculated using the combined distance to telomeres for each bin-pair (as in<sup>62</sup>),  
524 and excluded bins-pairs where one bin was closer to a centromere than telomere along that arm.  
525 Distance to centromeres, and  $P(s)$  stratified by this distance, was calculated similarly. Log2  
526 insulation profiles were calculated using a sliding diamond window (as in<sup>63</sup>) with a +/-20 kb (+/-10  
527 bins) extent; as in<sup>43</sup> downstream analyses were restricted to when there were zero or one filtered  
528 bins in the sliding window. To calculate histograms of cis/total (Fig. 2D), bins were defined as  
529 either Rec8 or non-Rec8. To calculate  $P(s)$  split by Rec8 bin-pair status, each bin-pair (i.e. entry  
530 of the heatmap) was assigned as either Rec8-Rec8, Rec8-nonRec8, or non-non (e.g. Fig. 2E).  
531  $P(s)$  was then aggregated separately across chromosomes for these three categories, similar to  
532 calculation of  $P(s)$  within and between TADs<sup>28</sup>. Average log2 observed/expected maps were  
533 calculated by first dividing by intra-arm  $P(s)$  and then averaging together appropriate patches of  
534 Hi-C maps. Correlations between Rec8 occupancy from<sup>27</sup> and insulation or cis/total profiles  
535 excluded chromosome 12 because the rDNA locus greatly alters the insulation profile within the  
536 right arm of the chromosome.

### 537 **Polymer simulations**

538 Meiotic loop extrusion simulations begin with a generic polymer representation of the yeast  
539 chromatin fiber similar to that used in previous models of yeast mitotic chromosomes<sup>21</sup>, where  
540 each 20 nm monomer represents 640 bp (~4 nucleosomes). We simulated the chromatin fiber  
541 with excluded volume interactions and without topological constraints, using Langevin dynamics  
542 in OpenMM, as in<sup>64,65</sup>. Importantly, meiotic simulations remove the geometric constraints specific  
543 to the Rab1 conformation<sup>66,67</sup> because this is not visible in meiotic pachytene *ndt80Δ* Hi-C maps.  
544 As our focus was to characterize the grids of intra-chromosomal interactions, we considered a  
545 system with multiple copies of chromosome 13, equivalent to four copies of the haploid genome  
546 in terms of total genomic content (4 x 13 copies of chromosome 13), to enable efficient  
547 computational averaging of simulated Hi-C maps. Extruded loops were generated according to  
548 parameters that describe the dynamics of loop extruders, using the simulation engine described  
549 in<sup>68</sup>: extruder *separation*, extruder *processivity*, chromatin fiber *relaxation time* relative to extruder  
550 velocity, and *barrier strength*. Because yeast chromosomes are short compared to higher  
551 eukaryote chromosomes, relaxation time is relatively rapid and we focused on *separation*,

552 *processivity*, and *barrier strength*. At every given timepoint an extruded loop is realized as a bond  
553 between monomers at the two bases of the loop (see `./src/examples/loopExtrusion` in  
554 <https://bitbucket.org/mirnylab/openmm-polymer/>).

555

556 Upon encountering a barrier, a loop extruder is paused with probability according to the barrier  
557 strength; barrier strength =1 indicates an impermeable barrier, barrier strength =0 indicates no  
558 impediment to extrusion. We assume loop extrusion occurs independently on each chromatid,  
559 and simulate loop extrusion dynamics on a 1D lattice (as in<sup>28</sup>) where the number of lattice sites  
560 equals the total number of monomers (75,140). Bi-directional barriers were placed at monomers  
561 with positions corresponding to Rec8 ChIP-seq sites<sup>27</sup>, and pause extruders according the barrier  
562 strength parameter. We assume a uniform birth probability, constant death probability, and that  
563 all barriers have an equal strength; as additional data becomes available, these assumptions can  
564 be relaxed and more detailed models can be built.

565

566 We investigated scenarios where chromatids are then either left individualized (52 copies),  
567 crosslinked to sisters (26 pairs), or additionally paired with homologs (13 pairs-of-pairs). For  
568 simulations with sister crosslinks, these were added (following<sup>54</sup>) when extruded loop bases were  
569 present at cognate positions  $\pm 30$  monomers ( $\sim 20$ kb) on both chromatids (distance=20nm);  
570 homolog crosslinks were added similarly when sister crosslinks were present on both chromatids  
571 (distance=100nm); centromeres and telomeres were always paired, and both presented  
572 impermeable (strength=1) boundaries to extruders. To avoid introducing pseudo-knots, if  
573 extruded loops were nested only the outer cohesins were considered as possible bases for sister  
574 crosslinks, sister crosslinks were only allowed between the same side of loop bases (i.e. left-to-  
575 left arm or right-to-right arm), and sister crosslinks were only added between bases at the  
576 reciprocal minimum distance.

577

578 For calculation of simulated Hi-C maps, contacts were recorded from conformations of the full  
579 system, which includes intra- and inter-sister, and interhomologue contacts. Because  
580 experimental Hi-C here does not distinguish either sisters or homologs, contacts were then  
581 aggregated into one simulated map. For each model and parameter set we investigated, we  
582 collected an ensemble of conformations, generated simulated chr13 Hi-C maps, and compared  
583 their features and  $P(s)$  with those from experimental Hi-C maps. Each simulated chr13 map  
584 represented an average over 5400 conformations.  $P(s)$  for chr13 was calculated from 2kb binned  
585 simulated maps exactly as for experimental maps. Maps of goodness-of-fit between simulations

586 and experimental data (e.g. **Fig. 3b,c**) were computed as the geometric standard deviation of the  
587 ratio of simulated to experimental  $P(s)$  combined across  $P^{Rec8-Rec8}(s)$ ,  $P^{Rec8-non}(s)$ , and  $P^{non-non}(s)$ ,  
588 as was previously done for  $P(s)$  within TADs of multiple sizes and between TADs<sup>28</sup>, for  $s$  from  
589 10kb to 300kb. This measure reflects the typical fold-deviation for  $P(s)$ .

590

591 Simulated ChIP-seq profiles (**Extended Data Fig. 6b**) for Rec8 were generated by aggregating  
592 the position of extruded loop bases (two per extruded loop) across conformations. Statistics of  
593 extruded loop positioning relative to Rec8 sites was calculated with *loopstats.py* in *looplib*  
594 (<https://github.com/golobor/looplib>), and arc diagrams (**Extended Data Fig. 6c**) with *loopviz.py*.  
595 Conformations showing chromatids or positions of extruded loop bases were rendered in PyMOL  
596 (<https://pymol.org/sites/default/files/pymol.bib>).

597

## 598 References

- 599 1. Zickler, D. & Kleckner, N. Meiotic chromosomes: integrating structure and function. *Annu Rev Genet* **33**,  
600 603-754 (1999).
- 601 2. Gray, S. & Cohen, P. E. Control of Meiotic Crossovers: From Double-Strand Break Formation to  
602 Designation. *Annu Rev Genet* (2016).
- 603 3. Klein, F. et al. A central role for cohesins in sister chromatid cohesion, formation of axial elements, and  
604 recombination during yeast meiosis. *Cell* **98**, 91-103 (1999).
- 605 4. Sym, M., Engebrecht, J. A. & Roeder, G. S. ZIP1 is a synaptonemal complex protein required for meiotic  
606 chromosome synapsis. *Cell* **72**, 365-378 (1993).
- 607 5. Smith, A. V. & Roeder, G. S. The yeast Red1 protein localizes to the cores of meiotic chromosomes. *J*  
608 *Cell Biol* **136**, 957-967 (1997).
- 609 6. Hollingsworth, N. M., Goetsch, L. & Byers, B. The HOP1 gene encodes a meiosis-specific component of  
610 yeast chromosomes. *Cell* **61**, 73-84 (1990).
- 611 7. Maleki, S., Neale, M. J., Arora, C., Henderson, K. A. & Keeney, S. Interactions between Mei4, Rec114,  
612 and other proteins required for meiotic DNA double-strand break formation in *Saccharomyces cerevisiae*.  
613 *Chromosoma* **116**, 471-486 (2007).
- 614 8. Li, J., Hooker, G. W. & Roeder, G. S. *Saccharomyces cerevisiae* Mer2, Mei4 and Rec114 form a  
615 complex required for meiotic double-strand break formation. *Genetics* **173**, 1969-1981 (2006).
- 616 9. Dekker, J., Rippe, K., Dekker, M. & Kleckner, N. Capturing chromosome conformation. *Science* **295**,  
617 1306-1311 (2002).
- 618 10. Bonev, B. & Cavalli, G. Organization and function of the 3D genome. *Nat Rev Genet* **17**, 661-678 (2016).
- 619 11. Merkenschlager, M. & Nora, E. P. CTCF and Cohesin in Genome Folding and Transcriptional Gene  
620 Regulation. *Annu Rev Genomics Hum Genet* **17**, 17-43 (2016).

- 621 12. Dekker, J. & Mirny, L. The 3D Genome as Moderator of Chromosomal Communication. *Cell* **164**, 1110-  
622 1121 (2016).
- 623 13. Fudenberg, G., Abdennur, N., Imakaev, M., Goloborodko, A. & Mirny, L. A. Emerging Evidence of  
624 Chromosome Folding by Loop Extrusion. *Cold Spring Harb Symp Quant Biol* **82**, 45-55 (2017).
- 625 14. Jin, Q., Trelles-Sticken, E., Scherthan, H. & Loidl, J. Yeast nuclei display prominent centromere  
626 clustering that is reduced in nondividing cells and in meiotic prophase. *J Cell Biol* **141**, 21-29 (1998).
- 627 15. Hayashi, A., Ogawa, H., Kohno, K., Gasser, S. M. & Hiraoka, Y. Meiotic behaviours of chromosomes and  
628 microtubules in budding yeast: relocalization of centromeres and telomeres during meiotic prophase.  
629 *Genes Cells* **3**, 587-601 (1998).
- 630 16. Goloborodko, A., Marko, J. F. & Mirny, L. A. Chromosome Compaction by Active Loop Extrusion.  
631 *Biophys J* **110**, 2162-2168 (2016).
- 632 17. Gibcus, J. H. et al. A pathway for mitotic chromosome formation. *Science* **359**, (2018).
- 633 18. Kakui, Y., Rabinowitz, A., Barry, D. J. & Uhlmann, F. Condensin-mediated remodeling of the mitotic  
634 chromatin landscape in fission yeast. *Nat Genet* **49**, 1553-1557 (2017).
- 635 19. Lazar-Stefanita, L. et al. Cohesins and condensins orchestrate the 4D dynamics of yeast chromosomes  
636 during the cell cycle. *EMBO J* **36**, 2684-2697 (2017).
- 637 20. Naumova, N. et al. Organization of the mitotic chromosome. *Science* **342**, 948-953 (2013).
- 638 21. Schalbetter, S. A. et al. SMC complexes differentially compact mitotic chromosomes according to  
639 genomic context. *Nat Cell Biol* **19**, 1071-1080 (2017).
- 640 22. Xu, L., Ajimura, M., Padmore, R., Klein, C. & Kleckner, N. NDT80, a meiosis-specific gene required for  
641 exit from pachytene in *Saccharomyces cerevisiae*. *Mol Cell Biol* **15**, 6572-6581 (1995).
- 642 23. Muller, H. et al. Characterizing meiotic chromosomes' structure and pairing using a designer sequence  
643 optimized for Hi-C. *Mol Syst Biol* **14**, e8293 (2018).
- 644 24. Rao, S. S. P. et al. A 3D map of the human genome at kilobase resolution reveals principles of chromatin  
645 looping. *Cell* **159**, 1665-1680 (2014).
- 646 25. Nora, E. P. et al. Spatial partitioning of the regulatory landscape of the X-inactivation centre. *Nature* **485**,  
647 381-385 (2012).
- 648 26. Dixon, J. R. et al. Topological domains in mammalian genomes identified by analysis of chromatin  
649 interactions. *Nature* **485**, 376-380 (2012).
- 650 27. Ito, M. et al. Meiotic recombination cold spots in chromosomal cohesion sites. *Genes Cells* **19**, 359-373  
651 (2014).
- 652 28. Fudenberg, G. et al. Formation of Chromosomal Domains by Loop Extrusion. *Cell Rep* **15**, 2038-2049  
653 (2016).
- 654 29. Schwarzer, W. et al. Two independent modes of chromatin organization revealed by cohesin removal.  
655 *Nature* **551**, 51-56 (2017).
- 656 30. Rao, S. S. P. et al. Cohesin Loss Eliminates All Loop Domains. *Cell* **171**, 305-320.e24 (2017).
- 657 31. Wutz, G. et al. Topologically associating domains and chromatin loops depend on cohesin and are  
658 regulated by CTCF, WAPL, and PDS5 proteins. *EMBO J* **36**, 3573-3599 (2017).

- 659 32. Gassler, J. et al. A mechanism of cohesin-dependent loop extrusion organizes zygotic genome  
660 architecture. *EMBO J* **36**, 3600-3618 (2017).
- 661 33. Conrad, M. N., Lee, C. Y., Wilkerson, J. L. & Dresser, M. E. MPS3 mediates meiotic bouquet formation in  
662 *Saccharomyces cerevisiae*. *Proc Natl Acad Sci U S A* **104**, 8863-8868 (2007).
- 663 34. Trelles-Sticken, E., Adelfalk, C., Loidl, J. & Scherthan, H. Meiotic telomere clustering requires actin for its  
664 formation and cohesin for its resolution. *J Cell Biol* **170**, 213-223 (2005).
- 665 35. Sun, X. et al. Transcription dynamically patterns the meiotic chromosome-axis interface. *Elife* **4**, (2015).
- 666 36. Møens, P. B. & Pearlman, R. E. Chromatin organization at meiosis. *Bioessays* **9**, 151-153 (1988).
- 667 37. Marko, J. F. & Siggia, E. D. Polymer models of meiotic and mitotic chromosomes. *Mol Biol Cell* **8**, 2217-  
668 2231 (1997).
- 669 38. Blat, Y. & Kleckner, N. Cohesins bind to preferential sites along yeast chromosome III, with differential  
670 regulation along arms versus the centric region. *Cell* **98**, 249-259 (1999).
- 671 39. Crawley, O. et al. Cohesin-interacting protein WAPL-1 regulates meiotic chromosome structure and  
672 cohesion by antagonizing specific cohesin complexes. *Elife* **5**, e10851 (2016).
- 673 40. Challa, K., Lee, M.-S., Shinohara, M., Kim, K. P. & Shinohara, A. Rad61/Wpl1 (Wapl), a cohesin  
674 regulator, controls chromosome compaction during meiosis. *Nucleic Acids Res* **44**, 3190-3203 (2016).
- 675 41. Jin, H., Guacci, V. & Yu, H.-G. Pds5 is required for homologue pairing and inhibits synapsis of sister  
676 chromatids during yeast meiosis. *J Cell Biol* **186**, 713-725 (2009).
- 677 42. Petela, N. J. et al. Scc2 Is a Potent Activator of Cohesin's ATPase that Promotes Loading by Binding  
678 Scc1 without Pds5. *Mol Cell* **70**, 1134-1148.e7 (2018).
- 679 43. Nora, E. P. et al. Targeted Degradation of CTCF Decouples Local Insulation of Chromosome Domains  
680 from Genomic Compartmentalization. *Cell* **169**, 930-944.e22 (2017).
- 681 44. Glynn, E. F. et al. Genome-wide mapping of the cohesin complex in the yeast *Saccharomyces*  
682 *cerevisiae*. *PLoS Biol* **2**, E259 (2004).
- 683 45. Lengronne, A. et al. Cohesin relocation from sites of chromosomal loading to places of convergent  
684 transcription. *Nature* **430**, 573-578 (2004).
- 685 46. Heinz, S. et al. Transcription Elongation Can Affect Genome 3D Structure. *Cell* **174**, 1522-1536.e22  
686 (2018).
- 687 47. Haarhuis, J. H. I. et al. The Cohesin Release Factor WAPL Restricts Chromatin Loop Extension. *Cell*  
688 **169**, 693-707.e14 (2017).
- 689 48. Tedeschi, A. et al. Wapl is an essential regulator of chromatin structure and chromosome segregation.  
690 *Nature* **501**, 564-568 (2013).
- 691 49. Busslinger, G. A. et al. Cohesin is positioned in mammalian genomes by transcription, CTCF and Wapl.  
692 *Nature* **544**, 503-507 (2017).
- 693 50. Ocampo-Hafalla, M., Muñoz, S., Samora, C. P. & Uhlmann, F. Evidence for cohesin sliding along  
694 budding yeast chromosomes. *Open Biol* **6**, (2016).
- 695 51. Ganji, M. et al. Real-time imaging of DNA loop extrusion by condensin. *Science* (2018).
- 696 52. Sanborn, A. L. et al. Chromatin extrusion explains key features of loop and domain formation in wild-type  
697 and engineered genomes. *Proc Natl Acad Sci U S A* **112**, E6456-65 (2015).



- 698 53. Nasmyth, K. Disseminating the genome: joining, resolving, and separating sister chromatids during  
699 mitosis and meiosis. *Annu Rev Genet* **35**, 673-745 (2001).
- 700 54. Goloborodko, A., Imakaev, M. V., Marko, J. F. & Mirny, L. Compaction and segregation of sister  
701 chromatids via active loop extrusion. *Elife* **5**, (2016).
- 702 55. Alipour, E. & Marko, J. F. Self-organization of domain structures by DNA-loop-extruding enzymes.  
703 *Nucleic Acids Res* **40**, 11202-11212 (2012).
- 704 56. Subramanian, V. V. et al. Persistent DNA-break potential near telomeres increases initiation of meiotic  
705 recombination on short chromosomes. *Biorxiv* 201889 (2017).
- 706 57. Thacker, D., Mohibullah, N., Zhu, X. & Keeney, S. Homologue engagement controls meiotic DNA break  
707 number and distribution. *Nature* **510**, 241-246 (2014).
- 708 58. Kerpedjiev, P. et al. HiGlass: web-based visual exploration and analysis of genome interaction maps.  
709 *Genome Biol* **19**, 125 (2018).
- 710 59. Belton, J. M. & Dekker, J. Hi-C in Budding Yeast. *Cold Spring Harb Protoc* **2015**, 649-661 (2015).
- 711 60. Servant, N. et al. HiC-Pro: an optimized and flexible pipeline for Hi-C data processing. *Genome Biol* **16**,  
712 259 (2015).
- 713 61. Hsieh, T. S., Fudenberg, G., Goloborodko, A. & Rando, O. J. Micro-C XL: assaying chromosome  
714 conformation from the nucleosome to the entire genome. *Nat Methods* **13**, 1009-1011 (2016).
- 715 62. Mizuguchi, T. et al. Cohesin-dependent globules and heterochromatin shape 3D genome architecture in  
716 *S. pombe*. *Nature* **516**, 432-435 (2014).
- 717 63. Crane, E. et al. Condensin-driven remodelling of X chromosome topology during dosage compensation.  
718 *Nature* **523**, 240-244 (2015).
- 719 64. Eastman, P. et al. OpenMM 7: Rapid development of high performance algorithms for molecular  
720 dynamics. *PLoS Comput Biol* **13**, e1005659 (2017).
- 721 65. Eastman, P. & Pande, V. S. Efficient nonbonded interactions for molecular dynamics on a graphics  
722 processing unit. *J Comput Chem* **31**, 1268-1272 (2010).
- 723 66. Wong, H. et al. A predictive computational model of the dynamic 3D interphase yeast nucleus. *Curr Biol*  
724 **22**, 1881-1890 (2012).
- 725 67. Tjong, H., Gong, K., Chen, L. & Alber, F. Physical tethering and volume exclusion determine higher-order  
726 genome organization in budding yeast. *Genome Res* **22**, 1295-1305 (2012).
- 727 68. Fudenberg, G. & Imakaev, M. FISH-ing for captured contacts: towards reconciling FISH and 3C. *Nat*  
728 *Methods* **14**, 673-678 (2017).
- 729

## Figure 1

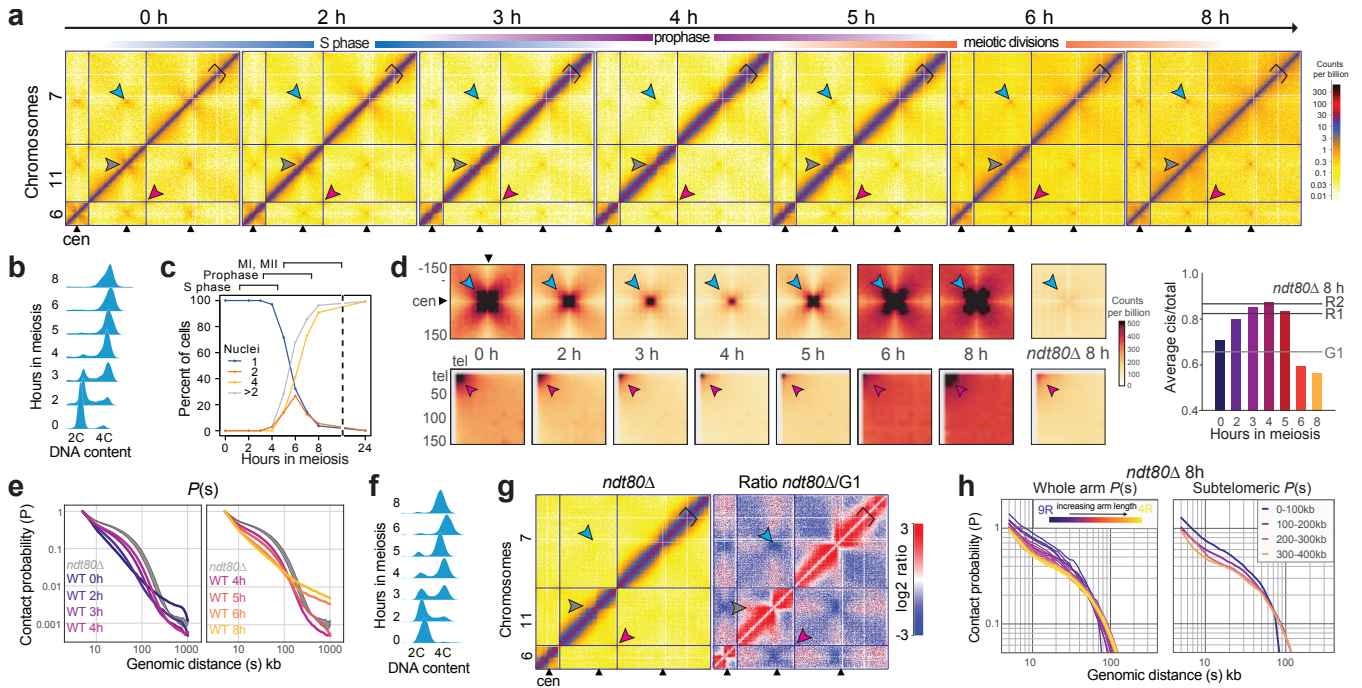

### Figure 1. Chromosome conformation during yeast meiosis.

- a.** Cells were collected during meiosis at indicated timepoints and analysed by Hi-C. At 0h the cells are in G1. Representative Hi-C contact maps of chromosomes 6, 11, and 7 plotted at 5 kb resolution. Centromeres, telomeres and arm fold-back at the centromere are indicated by blue, red and grey arrows, respectively, and axial compaction by the width of the main diagonal relative to the fixed-width black clamp. For interactive HiGlass<sup>52</sup> views see: <http://higlass.pollard.gladstone.org/app/?config=Z5iwKpjzQpePCXXyvuYGeQ>
- b.** Meiotic entry assessed by FACS; at 4 h, the majority of cells show a 4C peak indicating completion of DNA replication.
- c.** Meiotic progression was monitored by quantification of nuclear divisions determined by DAPI staining. Around 4 h, cells start to undergo meiotic divisions I and II. The majority of cells undergo meiotic divisions between 4 and 8 h, indicating the degree of heterogeneity within the cell population.
- d.** *Upper panels:* Average *trans* centromere-centromere contact maps. *Lower panels:* *trans* telomere-telomere contact maps. *Right:* ratio of *cis* to total contact frequency.
- e.** Intra-arm contact probability versus genomic distance,  $P(s)$ , indicating the emergence (*left*) and disappearance (*right*) of chromosome arm compaction during meiosis. Shaded area bounded above and below by the two *ndt80Δ* 8h replicates.
- f.** Meiosis was induced in *ndt80Δ* cells for 8h and meiotic entry was checked by monitoring DNA replication by FACS.
- g.** *ndt80Δ* cells were grown for 8h in sporulation media and analysed by Hi-C (*left*). Log<sub>2</sub> ratio of *ndt80Δ* cells 8h over G1 (*right*). Centromeres and telomeres are indicated by blue and red arrows, respectively, and axial compaction by a black clamp.
- h.** *Left:* Contact probability of individual chromosome arms stratified by length. *Right:* Contact probability stratified by the distance from the telomere.

## Figure 2

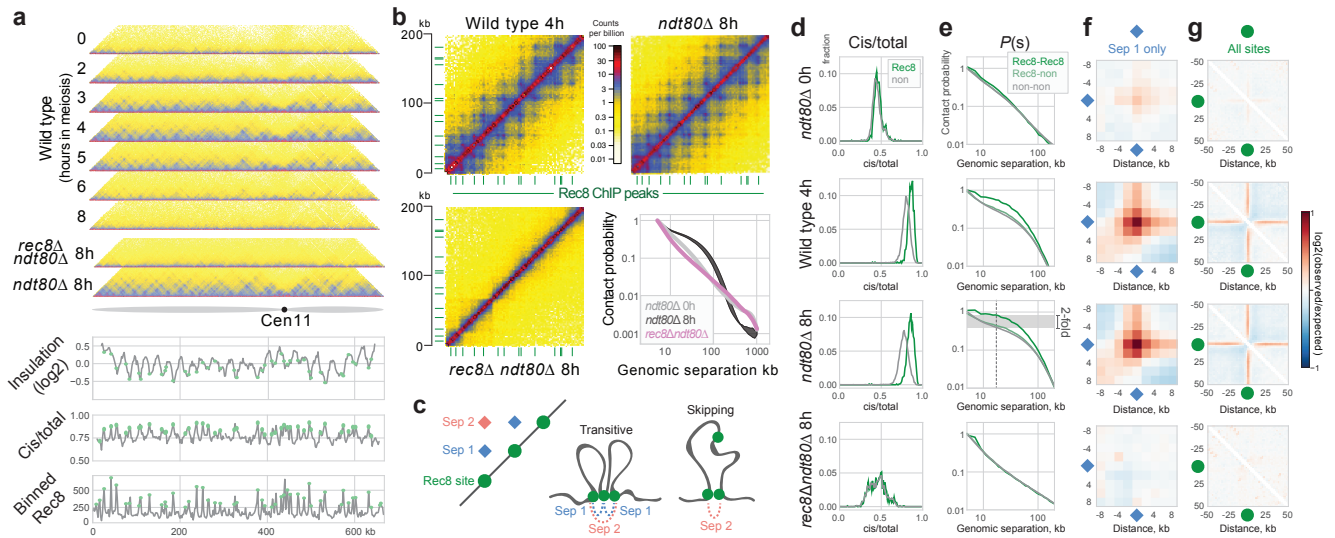

### Figure 2. Emergence of a Rec8-dependent grid of punctate interactions in meiosis

**a.** Hi-C contact maps of chromosome 11 for the indicated genotypes plotted at 2 kb bin resolution, showing near-diagonal interactions. Wild type timepoints as in **Fig. 1a**. **Lower panels:** log<sub>2</sub>(insulation); cis/total ratio, Rec8 ChIP-seq<sup>28</sup>, all binned at 2kb. Insulation and cis/total calculated from *ndt80Δ* maps. Positions of Rec8 sites indicated as green circles. Genome-wide cis/total (Spearman's  $R=0.62$ ,  $P<1e-10$ ) and insulation ( $R=-0.23$ ,  $P<1e-10$ , insulation window = 20 kb) profiles are correlated with Rec8 occupancy.

**b.** Zoom-in into contact maps on chromosome 11 (0-200kb) of wt-4h and *ndt80Δ* (top) and *rec8Δ* (bottom left). Contact probability versus genomic distance,  $P(s)$ , for G1(*ndt80Δ-0h*) and *ndt80Δ* and *rec8Δ* (bottom right). Data shown is the average ( $n=2$ ) except for wt-4h. Rec8 peak sites called from ChIP-seq data<sup>28</sup> are indicated in green. For an interactive view see: <http://higlass.pollard.gladstone.org/app/?config=Twrh61jGT4SlxotaguTlJg>

**c.** Simplified illustration of how a grid of peaks on a Hi-C map can emerge between Rec8 sites either by transitive contacts between adjacent loops, or by loops that skip over adjacent sites. Experimentally observed grids extend much further than separation=2 (**Extended Data Fig. 4c**)

**d.** Cis/total ratios for Rec8 (green) and nonRec8 (grey) sites for indicated datasets.

**e.** Contact frequency versus distance between Rec8-Rec8 sites (green), Rec8-nonRec8 sites (light green) and nonRec8-nonRec8 sites (grey).

**f.** Log<sub>2</sub> ratio of contact frequency between adjacent Rec8-sites (separation=1) compared to average cis interactions.

**g.** Log<sub>2</sub> ratio of contact frequency centered at Rec8 sites compared to average cis interactions.

In *ndt80Δ*, Rec8 sites show: elevated cis/total frequency (0.85 versus 0.77), elevated pairwise contact frequency (~2-fold at 20 kb), and mild insulation. These distinctions are similar in wild type pachytene (4h) yet absent in G1 (*ndt80Δ-0h*) or in *rec8Δ*.

## Figure 3

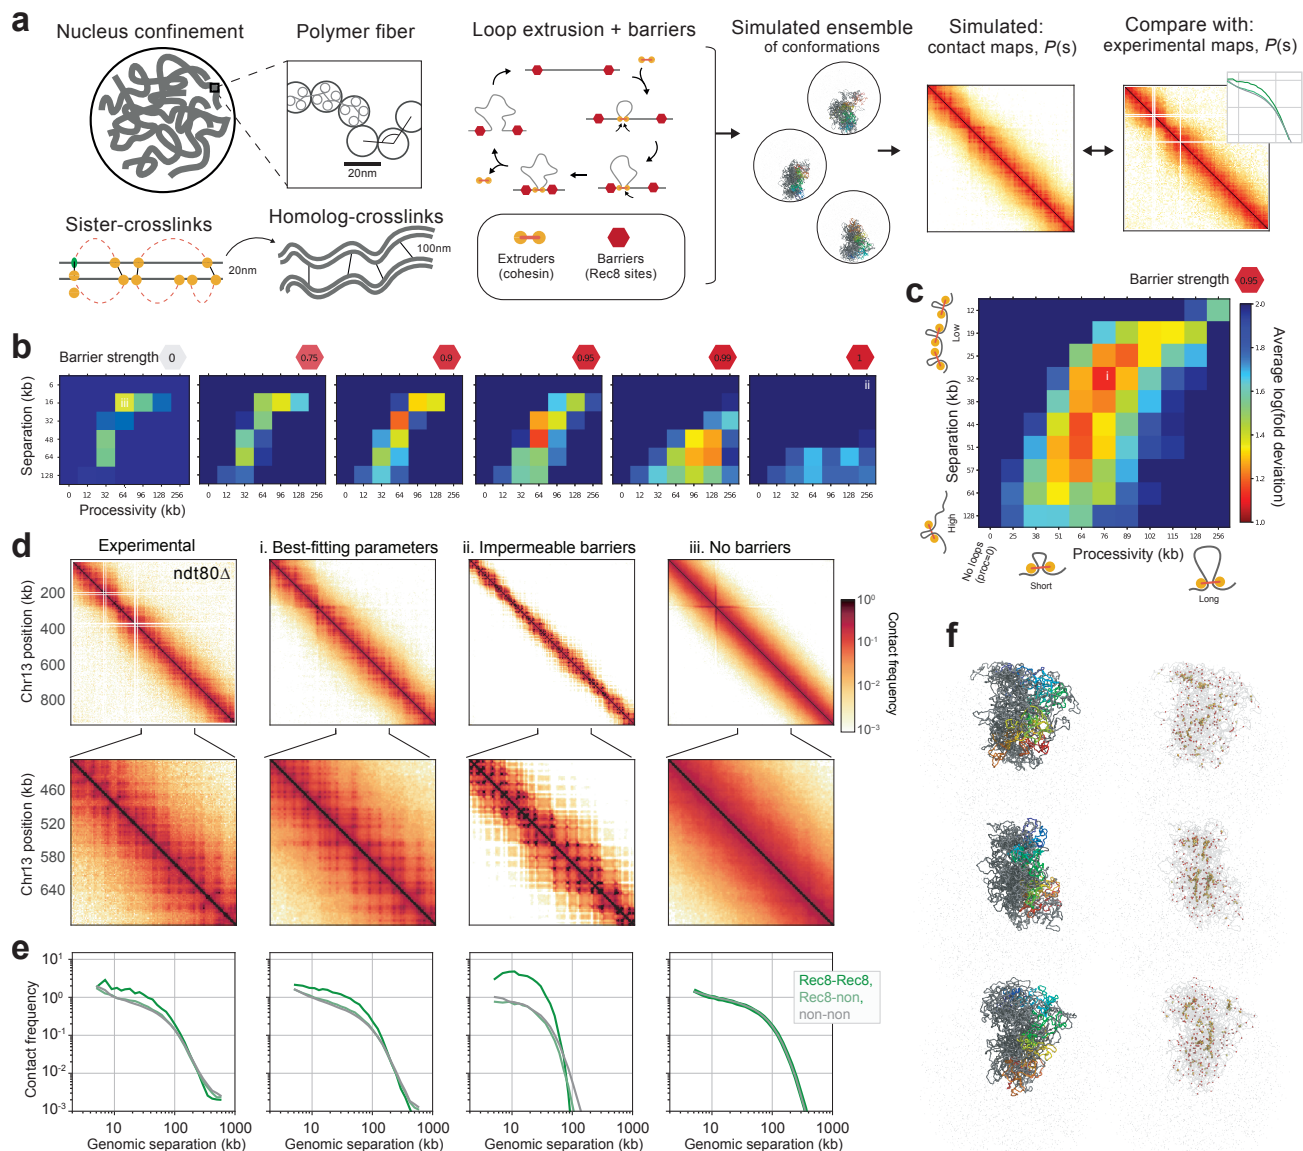

### Figure 3. Model for meiotic chromosome compaction in prophase.

**a.** In simulations, yeast chr13 was represented as a polymer fiber confined to the nucleus subject to additional meiosis-specific constraints. These include: extruded loops, sister crosslinks, and homolog crosslinks (**Methods**). Barriers to extruded loops were placed at Rec8 sites<sup>28</sup>. We imposed inter-sister and inter-homologue crosslinks at sites of extruded loop bases in order to approximate the paired arrangement of homologues at pachytene (**Extended Data Fig. 6**). For each set of extruded loop parameters (*processivity*, *separation*, and *barrier strength*), conformations were collected and used to generate simulated contact maps. These were then compared with experimental contact maps via the combined average fold discrepancy with  $P(s)$  curves for Rec8-Rec8, Rec8-non, and non-non bin pairs at 2 kb resolution.

**b.** Goodness-of-fit for indicated barrier strengths over coarse grids of processivity and separation demonstrate that intermediate barrier strengths are required to agree with experimental *ndt80Δ* Hi-C maps.

**c.** Goodness-of-fit for a fine grid of processivity versus separation at barrier strength 0.95. Best-fitting models had separation ~32kb and processivity ~76kb, corresponding to ~60% coverage of the genome by extruded loops of average length 26kb.

**d.** From *left to right*: contact maps for chr13 for *ndt80Δ*, and simulations with (i) best-fitting parameters, (ii) relatively stable loops between neighboring Rec8 sites, and (iii) no barriers.

**e.**  $P(s)$  split by Rec8-Rec8, Rec8-non, and non-non, as in **Fig. 2d**.

**f.** Conformations for best-fitting simulations, which highlight: (*left*) one chromatid colored from start (red) to end (blue); (*right*) extruders (yellow), extrusion barriers (red), and extruders paused at barriers (orange).

## Figure 4

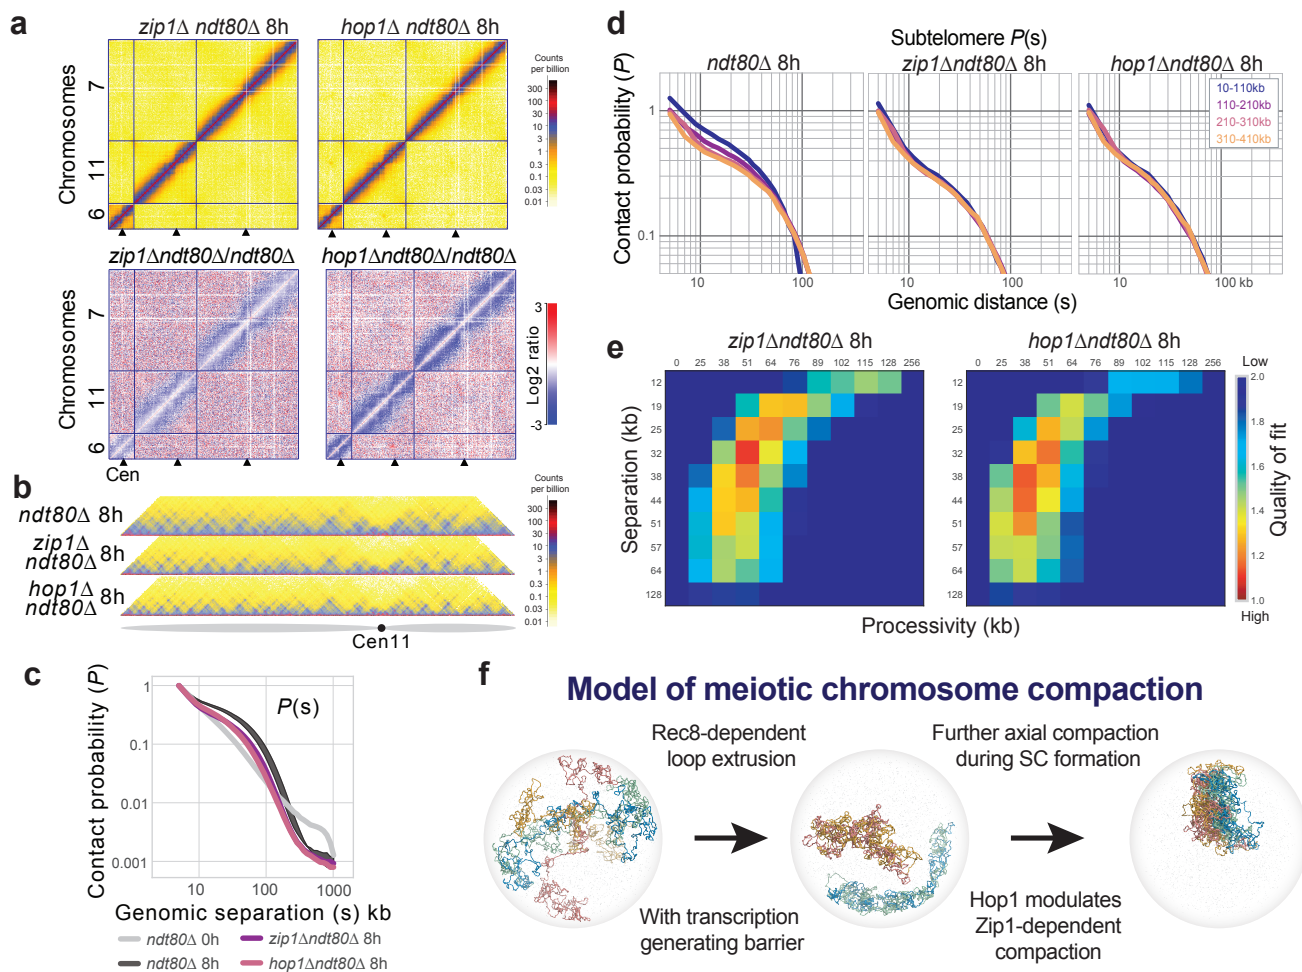

**Figure 4. Hop1 and Zip1-dependent compaction of Rec8-dependent loops.**

**a.** Top: Hi-C maps for *hop1Δ* and *zip1Δ* (plotted as in Fig. 1a). Bottom: Log<sub>2</sub> ratio of *hop1Δ* over *ndt80Δ* (as in Fig. 1g). For interactive views of the full genome, see <http://higlass.pollard.gladstone.org/app/?config=TTBGu5DDR0SHAa09zrjTXA>

**b.** Hi-C contact maps of chromosome 11 for *hop1Δ* and *zip1Δ* plotted at 2kb bin resolution, showing near-diagonal interactions, as in Fig. 2a.

**c.** Contact probability versus genomic distance for G1, *ndt80Δ*, *hop1Δ*, *zip1Δ*. Shaded area bounded above and below by *ndt80Δ* replicas. Average between two replicas for *zip1Δ* and one sample for G1 and *hop1Δ* are shown.

**d.** Contact probability over genomic distance averaged over all chromosome arms stratified by distance from the telomere.

**e.** Goodness-of-fit for simulations without homolog crosslinks with a fine grid of processivity versus separation at barrier strength 0.95 *zip1Δ* and *hop1Δ*.

**f.** Model of meiotic chromosome compaction: Rec8-dependent loop formation leads to initial chromosome arm compaction and emergence of a grid-like pattern of Hi-C interactions that jointly agrees with a mechanism of loop extrusion including barrier elements. We suggest that transcription could impose such barriers. Hop1 and Zip1 are dispensable for this step, but are required for synapsis, where additional compaction occurs differentially along chromosome arms.

## Extended Data Figure 1

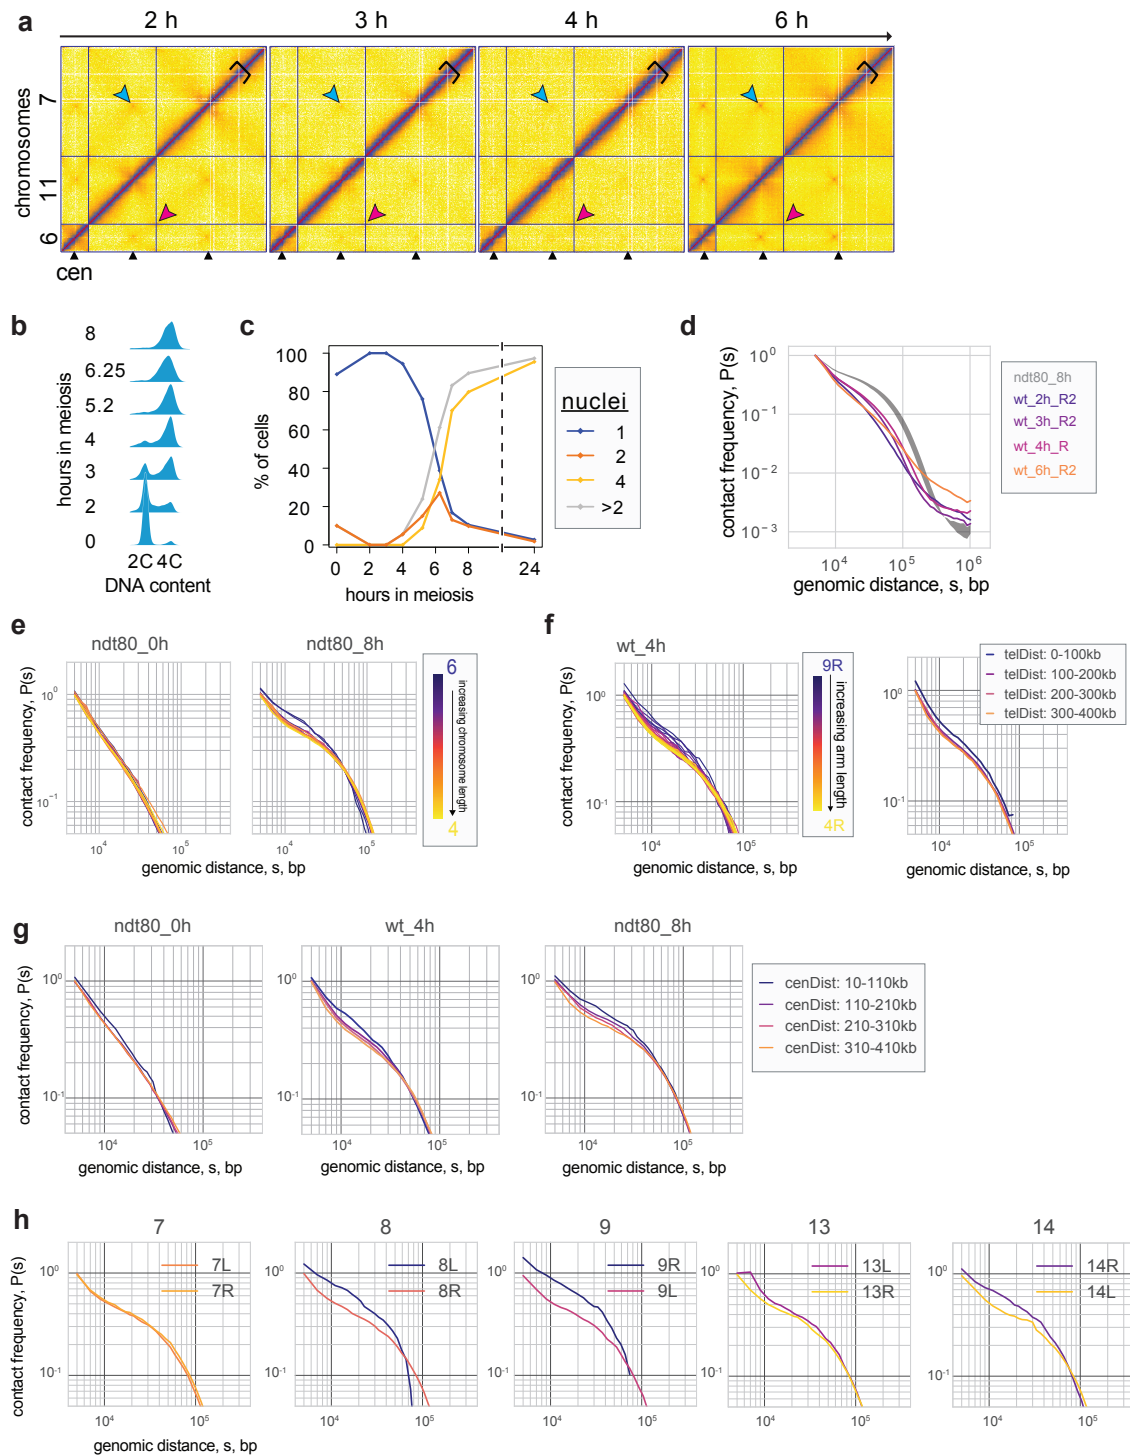

### Extended Data Fig. 1 Temporal and chromosome length-specific analysis of meiotic chromatin conformation

**a-d.** Results from a replicate timecourse, collected and characterized independently of the timecourse in Fig. 1.

**a.** Hi-C maps, plotted as in Fig. 1a.

**b.** FACS as in Fig. 1b.

**c.** DAPI as in Fig. 1c.

**d.**  $P(s)$  as in Fig. 1e.

**e.**  $P(s)$  for chromosomes stratified by size for *ndt80Δ-0h*, *ndt80Δ-8h*. Short chromosomes display relatively elevated  $P(s)$  at short distances, and an earlier shoulder.

**f.** *Left:*  $P(s)$  for individual chromosome arms, stratified by size for *wt-4h*. Short arms display relatively elevated  $P(s)$  at short distances, and an earlier roll-over. *Right:* Intra-arm  $P(s)$  stratified by the distance from the telomere for *wt-4h*, averaged across all chromosomes. Telomere-proximal regions display elevated  $P(s)$  at short distances.

**g.** Intra-arm  $P(s)$  stratified by the distance from the centromere for G1 (*ndt80Δ-0h*), *wt-4h*, *ndt80Δ-8h*, averaged across all chromosomes.

**h.** Contact probability of single chromosome arms for *ndt80Δ-8h*.

## Extended Data Figure 2

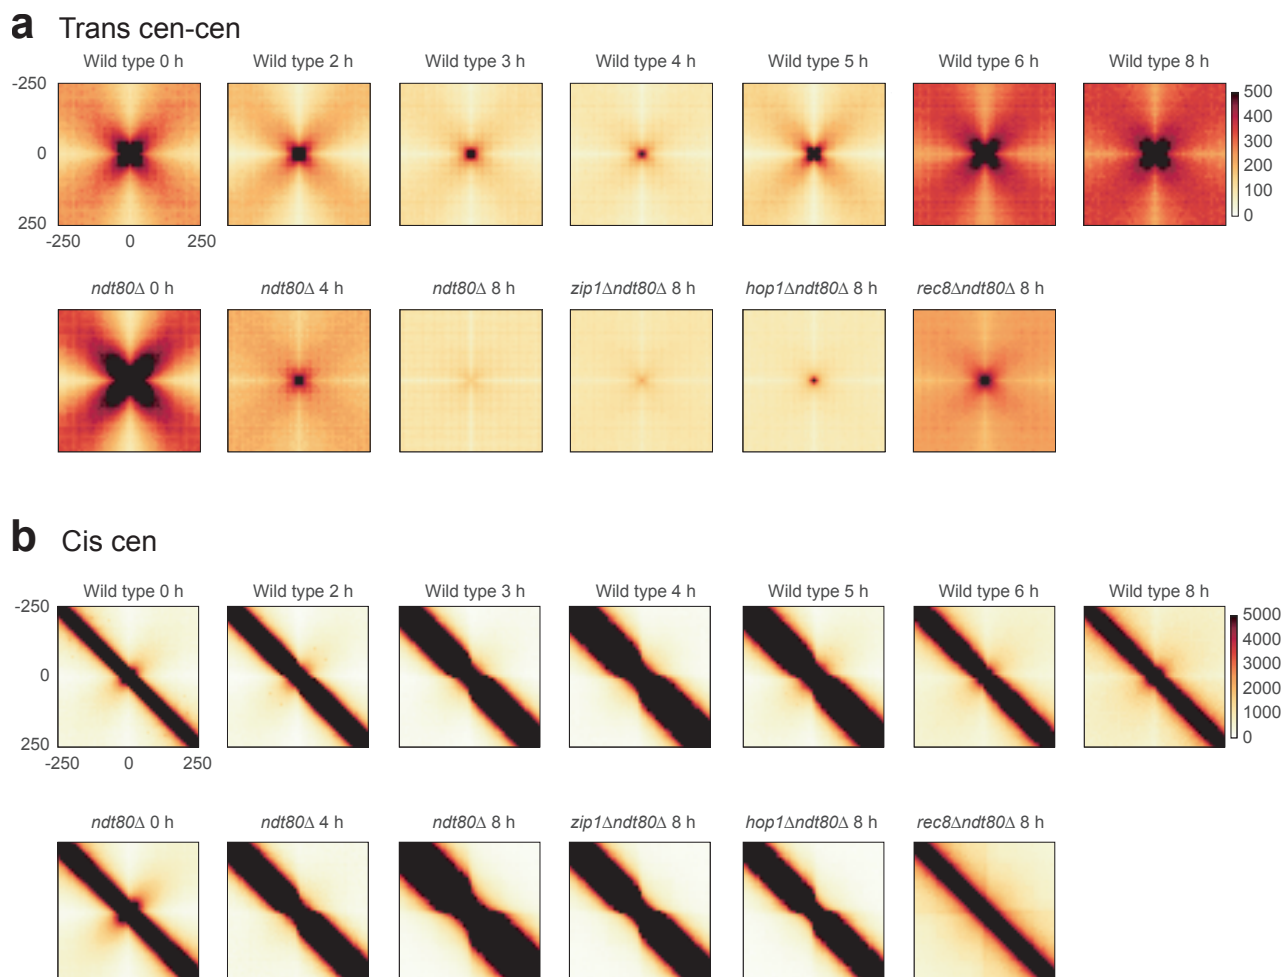

### Extended Data Fig. 2 Aggregate analysis of centromeric interactions in meiosis

**a.** Average *trans* centromere-centromere contact maps for indicated data sets.

**b.** Average *cis* centromere-centromere contact maps for indicated data sets. Note the loss of the folding back in meiosis, and how the intra-arm enrichment is insulated at centromeres in meiosis.

## Extended Data Figure 3

### a Trans tel-tel

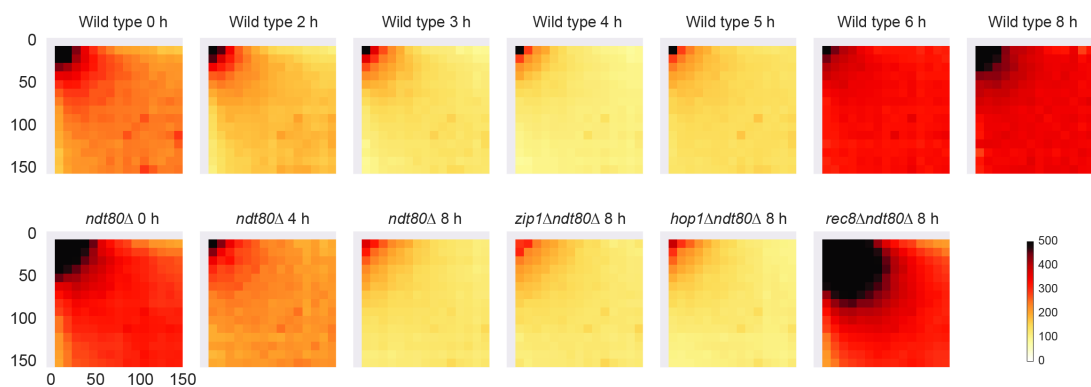

### b Cis tel-tel

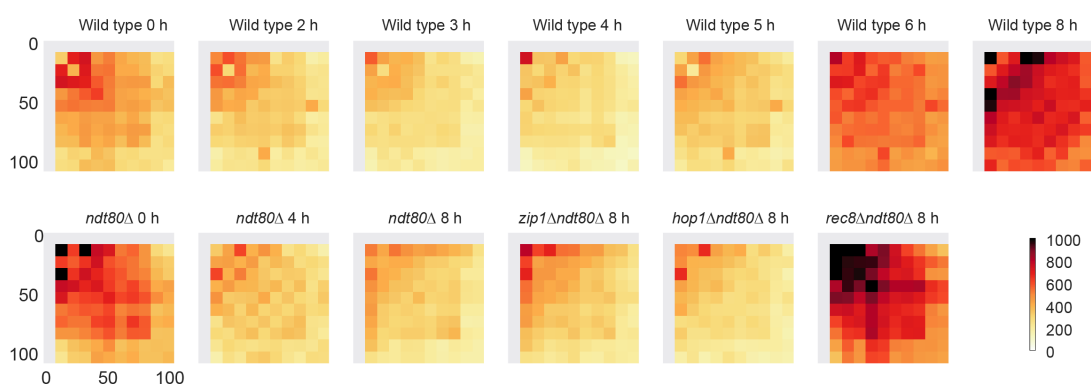

### c Cis-arm tel

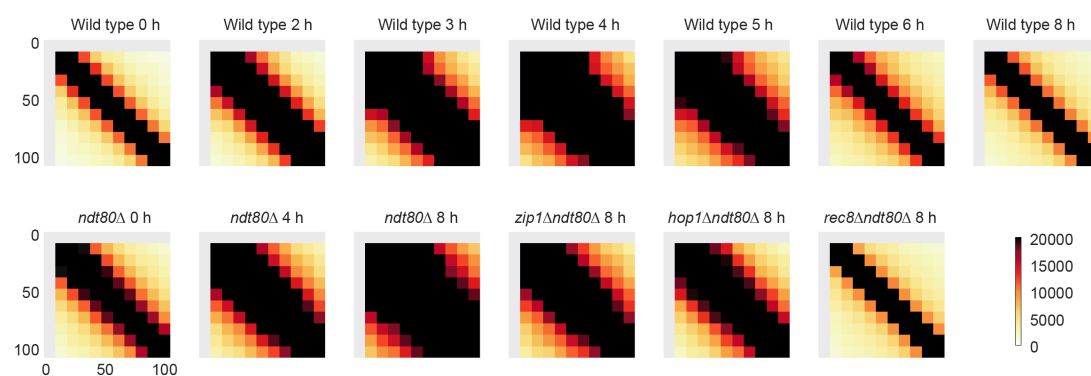

### Extended Data Fig. 3 Aggregate analysis of telomeric interactions in meiosis

- Average trans telomere-telomere contact maps for indicated datasets.
- Average telomere-telomere contact maps between the two telomeres of the same chromosome.
- Average contact map around each telomere in cis.



## Extended Data Figure 4

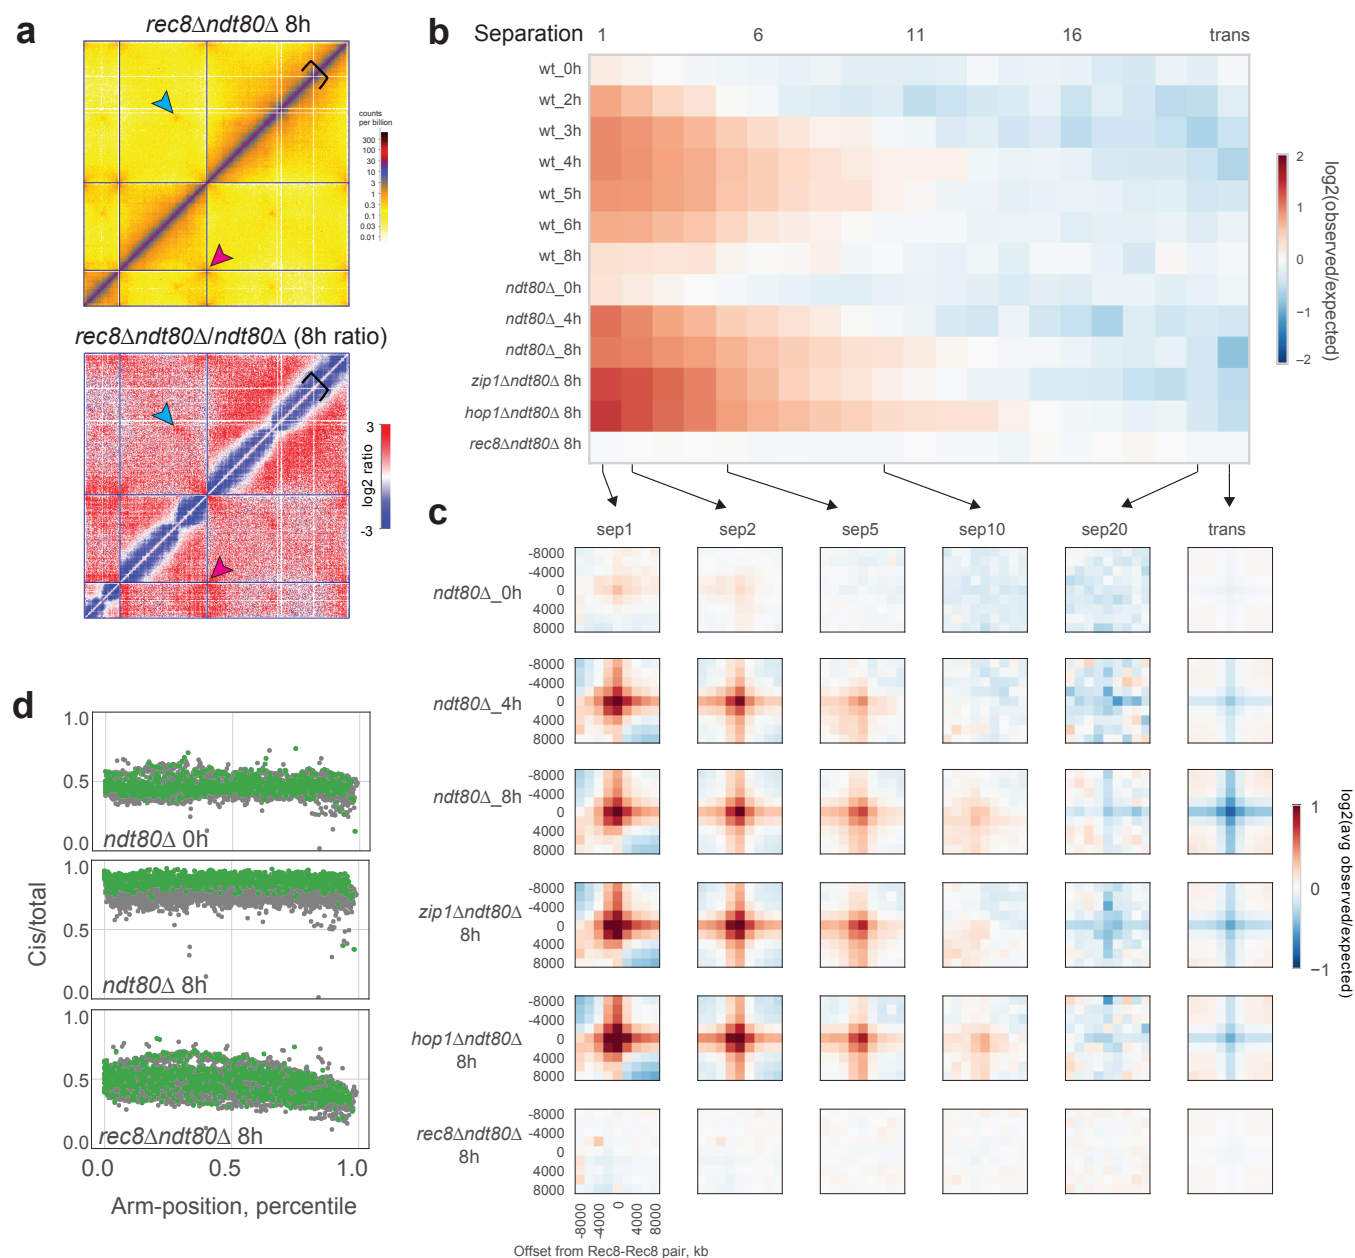

### Extended Data Fig. 4 Preferred sites of Rec8 occupancy define sites of locus-specific interaction

**a.** *Left:* Hi-C contact maps of *rec8Δ ndt80Δ*. Chromosomes 6, 11 and 7 are shown as representatives for the whole genome. *Right:* Log<sub>2</sub> Hi-C ratio maps of *rec8Δ ndt80Δ / ndt80Δ*. Plotted as in Fig. 1g.

**b.** Log<sub>2</sub> observed over expected contact frequency at Rec8-Rec8 peak pairs as a function of separation across datasets.

**c.** Log<sub>2</sub> observed over expected contact frequency +/- 8 kb around Rec8-Rec8 peak pairs at the indicated separations.

Together, **b-c** demonstrate that Rec8-Rec8 enrichments are strongest between adjacent sites, decrease between non-adjacent sites with increasing genomic separation, and are absent in *trans*. Equally important, these meiotic features are lost in *rec8Δ*. As for mammalian interphase, this observation in meiosis argues for a *cis*-acting process underlying the formation of focal interactions between Rec8 sites.

**d.** cis/total as a function of distance along the chromosomal arm, Rec8 sites marked in green.

## Extended Data Figure 5

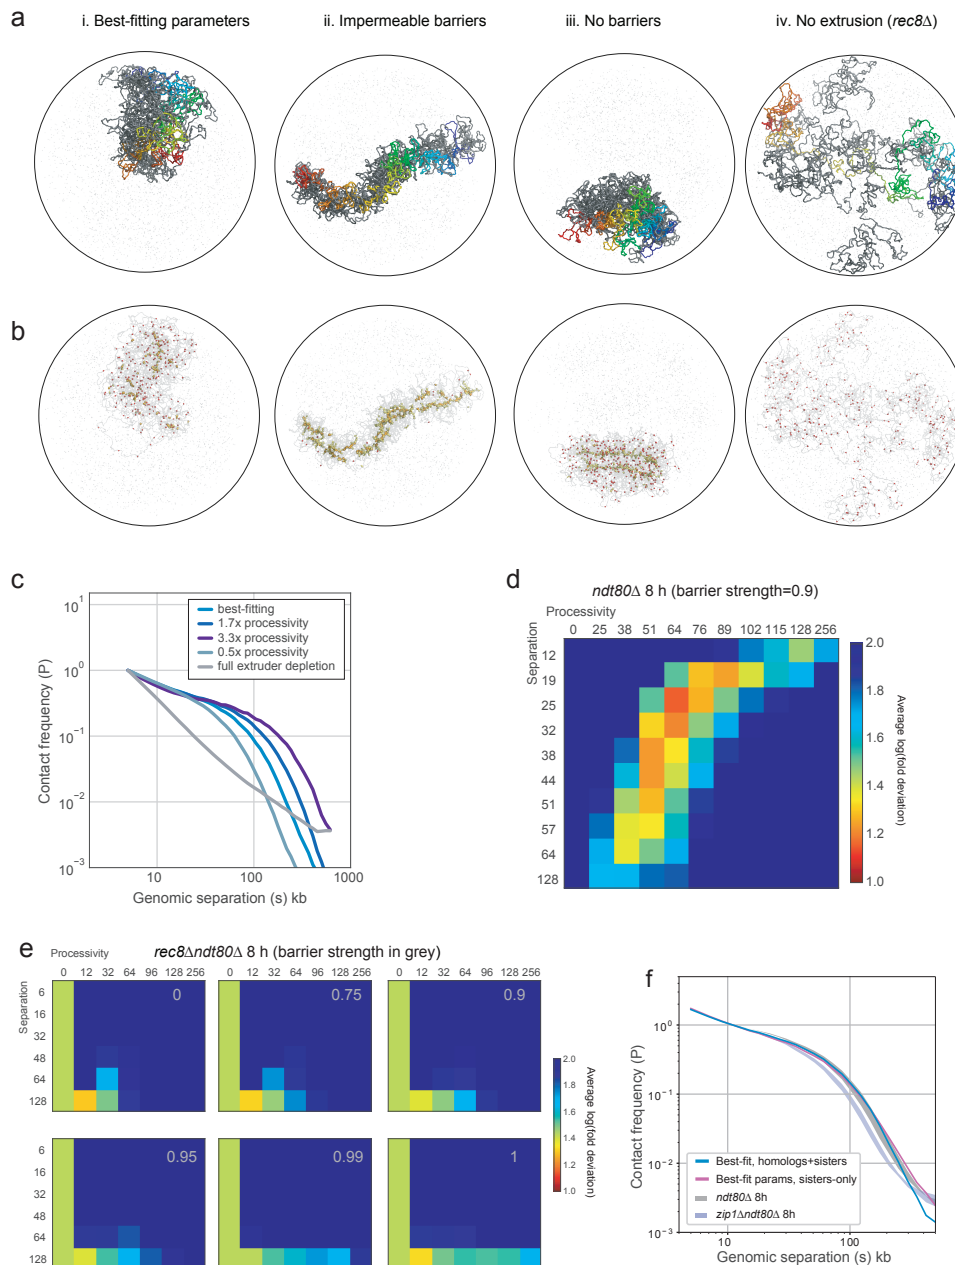

### Extended Data Fig. 5 Polymer simulations of loop extrusion reveal best fitting parameters and conformations

**a.** Representative conformation for the indicated parameter sets. As in **Fig. 3F**, one chromatid from a homologous quartet of chromatids coloured from start to end according to the spectrum; other three coloured in grey.

**b.** For the same three conformations, positions of Rec8 sites indicated with red spheres, positions of extruded loop bases in yellow, and extruders overlapping a Rec8 site in orange. Note the stable loops between neighbouring Rec8 sites creates a very elongated chromatid (ii). Also note the majority of Rec8 sites are unoccupied in (iii), despite the self-assembly of two axial cores and a strong brush. Finally, note very dispersed chromosomes in (iv), consistent with EM<sup>3</sup> for *rec8Δ*.

**c.** Contact frequency versus distance,  $P(s)$ , for indicated simulations. Note that the loss of the shoulder in  $P(s)$  in the case of full extruder depletion mirrors the difference between experimental *ndt80Δ* and *rec8Δ* Hi-C maps. Simulations with increased processivity predict that  $P(s)$  would shift rightward if unloading was impaired, as could happen in *waplΔ*. Conversely, if unloading was enhanced, simulations with decreased processivity indicate a leftward shift in  $P(s)$ , until the absence of extruders.

**d.** Goodness-of-fit for a fine grid of processivity versus separation at barrier strength 0.90. The best-fit occurs at similar processivity and separation as for barrier strength 0.95 shown in **Fig. 3c**, but with slightly lower goodness-of-fit.

**e.** Goodness-of-fit to *rec8Δ* data for simulations with the indicated barrier strengths (in grey: 0.00, 0.75, 0.90, 0.95, 0.99, 1.00) over coarse grids of processivity and separation demonstrates that the best fits have few if any extruded loops, regardless of barrier strength.

**f.**  $P(s)$  curves for simulations with sisters and homologs with the best-fitting parameters for *ndt80Δ-8h* maps compared to  $P(s)$  for simulations with sisters only show that simply removing homolog tethering does not recapitulate the sort of shifted  $P(s)$  seen experimentally in *zip1Δ* Hi-C.

## Extended Data Figure 6

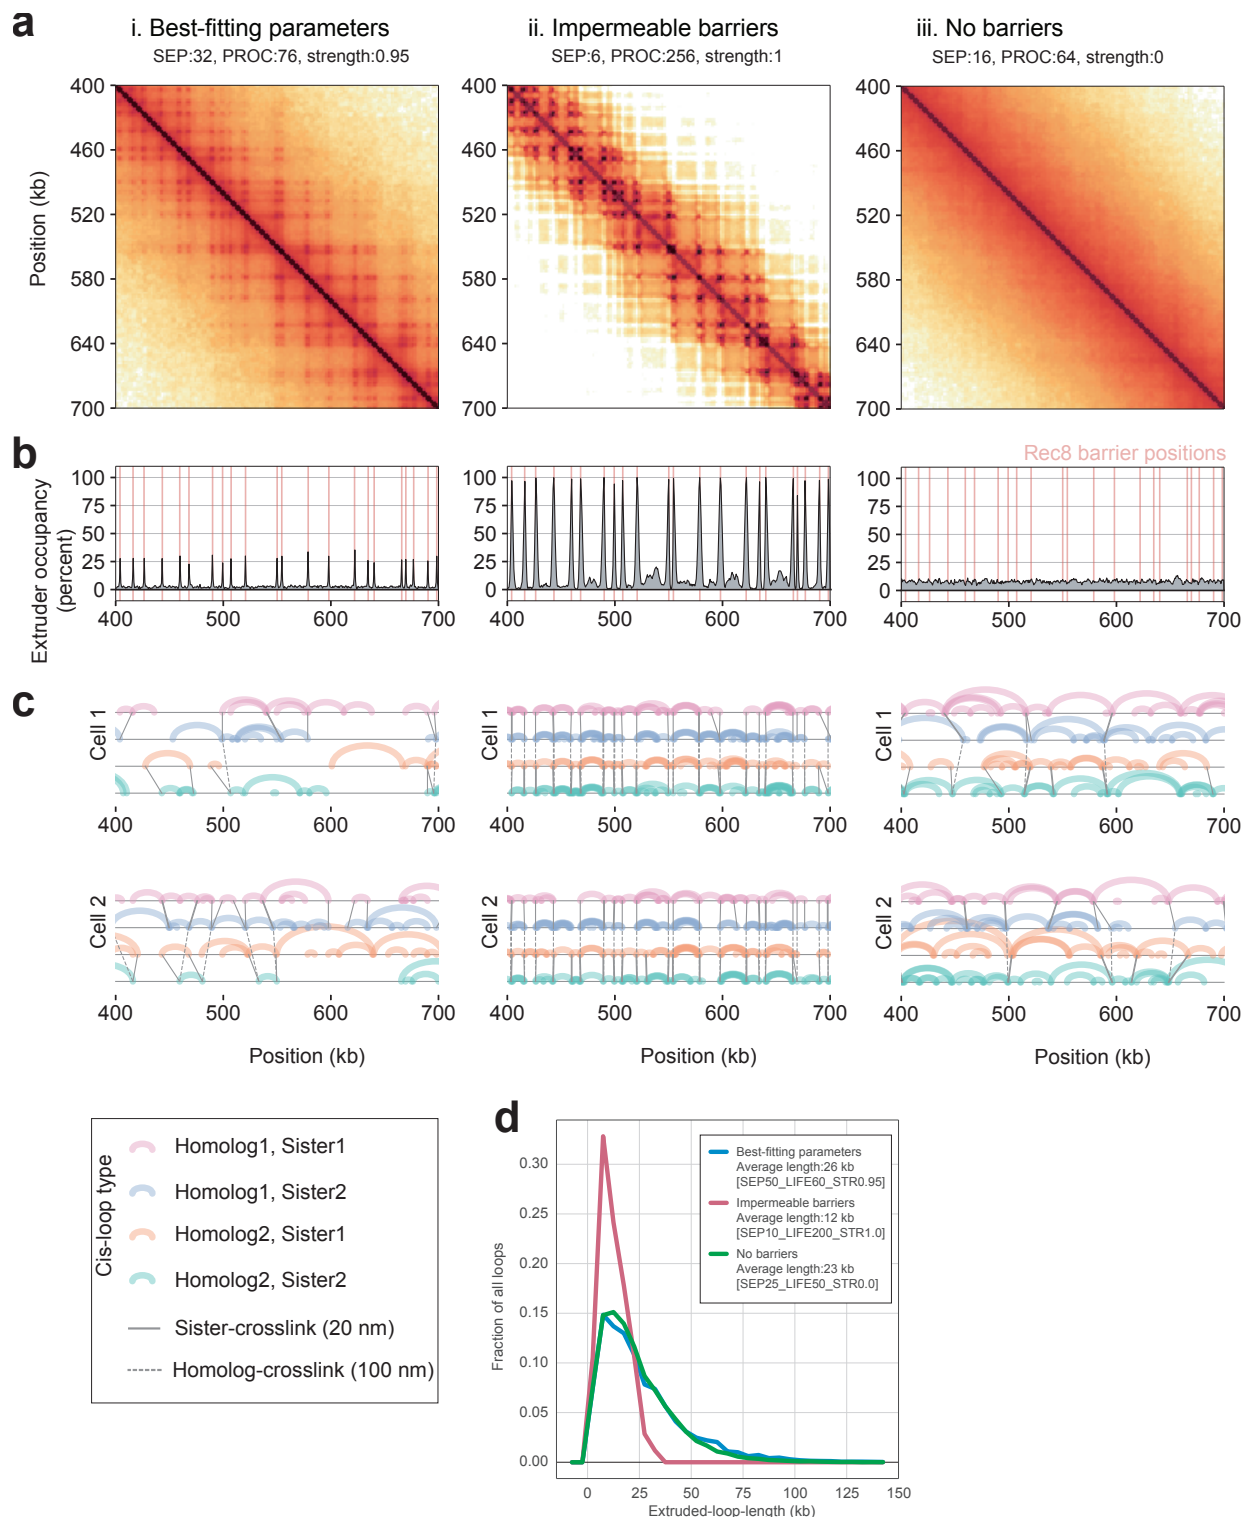

### Extended Data Fig. 6 Polymer simulations of loop extrusion elucidate meiotic barrier strength

**a.** Simulated contact maps for the indicated region of chr13 for: (i) best-fitting simulations, (ii) simulations with relatively stable loops between neighboring Rec8 sites (barrier strength=1 and high processivity), and (iii) no barriers, as in Fig. 2d.

**b.** Simulated ChIP-seq profiles for the indicated region of chr13. Best-fitting simulations (i) display occupancy well below 100% at Rec8 sites. Simulations with stable loops (ii) display highly occupied Rec8 sites. Simulations without barriers (iii) have homogenous Rec8 occupancy across the genome.

**c.** Positions of extruded loops (arcs) sister crosslinks (solid black lines) and homolog crosslinks (dashed lines) for four chromatids in two separate cells, showing how the simulated Hi-C maps and ChIP-seq profiles emerge from the stochastic positioning of extruded loops from cell-to-cell. For statistics, see Supplementary Table S1.

**d.** Histogram of extruded loop lengths for indicated parameters (i, ii, iii).

## Extended Figure 7

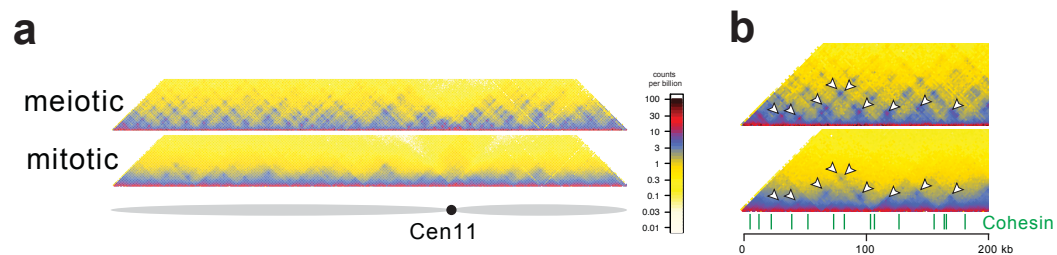

### Extended Data Figure 7. Cohesin and transcription patterns loops in meiosis and mitosis

**a.** Hi-C contact maps of chromosome 11 for meiotic (*ndt80* $\Delta$ , pachytene - top) and mitotic (wild type, nocodazole arrest - bottom) plotted at 2 kb bin resolution, showing near-diagonal interactions. Data shown is the average (n=2).

**b.** Zoom-in into contact maps on chromosome 11 (0-200kb) of *ndt80* $\Delta$  (top) and mitotic (bottom). Data shown is the average (n=2). Rec8 peak sites called from ChIP-seq data<sup>27</sup> are indicated in green. Arrowheads indicate sites of prominent focal interaction.
